# Supplementary material for: Admixture and breed traceability in European indigenous pig breeds and wild boar using genome-wide SNP data
Source: Springer Nature journal article supplement (doi:10.1038/s41598-022-10698-8), 2022-05-05

## Supplementary Materials

**Supplementary Table S1.** Model assessment based on minimum prediction error (LMSE) or the highest mean success (HMS).

| Sample, % | N. Breed | N. IDs | N. PCs (HMS) | N. PCs (LMSE) | Var. PCs (HMS) | Var. PCs (LMSE) | Assign. Success (HMS) | Assign. Success (LMSE) |
|-----------|----------|--------|--------------|---------------|----------------|-----------------|-----------------------|------------------------|
| 30        | 24       | 356    | 50           | 100           | 0.491          | 0.631           | 0.9775                | 0.9803                 |
| 40        | 24       | 474    | 100          | 200           | 0.592          | 0.761           | 0.9852                | 0.9873                 |
| 50        | 24       | 593    | 150          | 150           | 0.642          | 0.642           | 0.9882                | 0.9882                 |
| 60        | 24       | 712    | 100          | 100           | 0.545          | 0.545           | 0.9831                | 0.9831                 |
| 70        | 24       | 830    | 100          | 100           | 0.532          | 0.532           | 0.9855                | 0.9855                 |
| 80        | 24       | 949    | 150          | 150           | 0.591          | 0.591           | 0.9884                | 0.9884                 |
| 90        | 24       | 1067   | 100          | 200           | 0.518          | 0.634           | 0.9888                | 0.9897                 |
| 100       | 24       | 1186   | 100          | 150           | 0.513          | 0.575           | 0.9890                | 0.9890                 |
| Average   | /        | /      | /            | /             | /              | /               | 0.9857                | 0.9865                 |

Sample = percentage of data sampled at random; N. Breed = number of breeds analyzed in each sample; N. IDs = number of pigs analyzed in each sample; N. PCs = number of principal components (PCs) selected; Var. PCs = variance explained of the selected PCs; Assign. Success = overall model assignment success.

**Supplementary Table S2** Averaged admixture ancestries per breed at K=24.

| Breed                                                             | V1           | V2           | V3           | V4           | V5           | V6           | V7           | V8           | V9           | V10          | V11          | V12          | V13  | V14          | V15          | V16          | V17          | V18          | V19          | V20          | V21          | V22          | V23          | V24          |
|-------------------------------------------------------------------|--------------|--------------|--------------|--------------|--------------|--------------|--------------|--------------|--------------|--------------|--------------|--------------|------|--------------|--------------|--------------|--------------|--------------|--------------|--------------|--------------|--------------|--------------|--------------|
| Alentejana Apulo Calabrese                                        | 0.31         | 0.38         | 0.09         | 0.28         | 0.22         | 0.75         | 0.21         | 0.37         | 0.14         | 0.07         | 0.45         | 0.09         | 0.15 | 0.26         | 0.32         | 0.16         | 0.11         | 0.18         | 0.14         | 0.45         | 0.17         | 0.29         | 0.11         | <b>94.31</b> |
| Basque                                                            | 0.01         | 0.00         | 0.05         | 0.01         | 0.01         | 0.00         | 0.00         | 0.00         | 0.05         | 0.00         | 0.02         | 0.00         | 0.02 | 0.22         | 0.03         | <b>99.39</b> | 0.00         | 0.06         | 0.00         | 0.00         | 0.04         | 0.00         | 0.00         | 0.10         |
| Bisara Black Slavonian                                            | 1.47         | 0.78         | 2.15         | 0.80         | 0.25         | 0.59         | 0.41         | <b>3.03</b>  | 1.21         | 1.57         | 1.61         | 0.93         | 1.55 | 0.84         | 1.10         | 0.64         | <b>73.77</b> | 1.19         | 1.84         | 0.75         | 0.98         | 0.65         | 0.29         | 1.61         |
| Casertana                                                         | <b>71.57</b> | 0.56         | 0.77         | 0.98         | <b>3.86</b>  | 1.65         | 0.40         | 0.99         | 1.09         | 1.14         | 0.81         | 0.93         | 0.96 | 0.61         | <b>7.68</b>  | 0.57         | 0.48         | 1.39         | 0.83         | 0.46         | 0.43         | 0.30         | 0.59         | 0.94         |
| CintaSenese                                                       | 0.07         | 0.13         | 0.15         | 0.20         | 0.09         | 0.25         | 0.11         | 0.05         | 0.06         | 0.05         | <b>44.64</b> | 0.09         | 0.07 | 0.04         | 0.12         | 0.01         | 0.01         | 0.17         | 0.06         | 0.13         | 0.06         | <b>53.11</b> | 0.01         | 0.35         |
| Duroc                                                             | <b>6.40</b>  | 0.65         | 0.82         | 0.39         | 0.09         | 0.52         | 0.15         | 0.52         | 0.33         | 0.33         | 0.58         | 0.12         | 0.59 | 0.07         | <b>80.07</b> | 0.16         | 0.10         | <b>5.65</b>  | 0.83         | 0.12         | 0.35         | 0.17         | 0.17         | 0.84         |
| Gascon                                                            | 0.06         | 0.40         | 0.14         | 0.20         | 0.05         | 0.02         | 0.10         | 0.02         | 0.05         | 0.05         | 0.04         | 0.06         | 0.17 | 0.02         | 0.14         | 0.03         | 0.05         | <b>97.70</b> | 0.02         | 0.09         | 0.04         | 0.22         | 0.05         | 0.30         |
| Iberian                                                           | 0.08         | 0.05         | 0.04         | 0.05         | 0.04         | 0.03         | 0.02         | 0.02         | 0.00         | 0.09         | 0.09         | 0.04         | 0.02 | <b>97.78</b> | 0.10         | 0.57         | 0.02         | 0.05         | 0.12         | 0.11         | 0.02         | 0.03         | 0.02         | 0.60         |
| Krskopolje                                                        | 0.13         | 0.20         | 0.02         | 0.12         | 0.32         | 2.98         | 0.15         | 0.01         | 0.14         | 0.10         | 0.07         | 0.11         | 0.13 | 0.03         | 0.28         | 0.06         | 0.08         | <b>3.73</b>  | 0.02         | 0.79         | 0.03         | 0.01         | 0.06         | <b>90.43</b> |
| Landrace                                                          | 0.40         | 0.53         | 0.58         | 0.56         | 0.14         | 0.16         | 0.39         | 1.35         | <b>84.67</b> | 2.55         | 0.32         | 0.31         | 0.76 | 0.19         | 0.88         | 0.34         | 0.87         | 2.99         | 0.42         | 0.27         | 0.32         | 0.36         | 0.35         | 0.32         |
| LargeWhite Lithuanian Indigenous Wattle Lithuanian White Old Type | 0.88         | 0.53         | 1.21         | 0.70         | 0.36         | 0.06         | 0.17         | <b>85.33</b> | 0.96         | 1.61         | 0.71         | 0.33         | 0.53 | 0.52         | 0.58         | 0.77         | 1.35         | 0.11         | 1.20         | 0.43         | 0.37         | 0.57         | 0.27         | 0.47         |
| MajorcanBlack                                                     | 0.27         | 0.30         | <b>83.03</b> | 0.53         | 0.15         | 0.08         | 0.38         | 1.86         | 0.55         | 0.94         | 0.56         | 0.11         | 0.68 | 1.19         | 0.60         | 0.33         | 0.74         | 0.38         | <b>4.47</b>  | 0.11         | 1.79         | 0.52         | 0.22         | 0.25         |
| MoraRomagnola                                                     | 0.13         | 0.18         | 0.52         | 0.47         | 0.13         | 0.09         | 0.18         | 0.07         | 0.06         | 0.04         | 0.07         | 0.12         | 0.16 | 0.27         | 0.10         | 0.07         | 0.13         | 0.08         | <b>4.94</b>  | 0.17         | <b>91.63</b> | 0.08         | 0.03         | 0.29         |
| Moravca                                                           | 0.12         | 0.28         | <b>5.71</b>  | 0.07         | 0.07         | 0.00         | 0.09         | 0.32         | 0.26         | 0.19         | 0.21         | 0.07         | 0.16 | 0.17         | 0.42         | 0.12         | 0.40         | 0.13         | <b>88.49</b> | 0.10         | 1.94         | 0.24         | 0.06         | 0.39         |
| NeroSiciliano                                                     | 0.77         | 0.13         | 0.13         | 0.35         | 0.23         | 0.62         | 0.37         | 0.52         | 0.11         | 0.26         | 0.26         | 0.14         | 0.37 | 0.28         | 0.77         | 0.19         | 0.13         | 0.97         | 0.41         | <b>91.13</b> | 0.25         | 0.22         | 0.34         | 1.07         |
| Sarda Schwabisch-Hallisches Schwein Swallow-Bellied Mangalitsa    | 0.02         | <b>98.14</b> | 0.01         | 0.00         | 0.04         | 0.00         | 0.06         | 0.13         | 0.00         | 0.00         | 0.02         | 0.00         | 0.03 | 0.00         | 0.00         | 0.00         | 0.02         | 1.34         | 0.00         | 0.01         | 0.02         | 0.02         | 0.00         | 0.14         |
| Turopolje                                                         | 2.87         | 0.43         | 2.70         | <b>61.22</b> | 0.38         | 0.40         | 1.72         | <b>7.74</b>  | 2.13         | 2.80         | 1.79         | <b>4.80</b>  | 1.17 | 0.95         | 0.56         | 0.70         | 1.05         | 1.32         | 2.28         | 0.64         | 0.79         | 0.61         | 0.34         | 0.62         |
| WildBoar                                                          | 1.79         | 1.74         | <b>7.80</b>  | <b>4.06</b>  | 0.46         | <b>15.00</b> | 2.23         | <b>4.57</b>  | <b>4.93</b>  | <b>3.38</b>  | <b>7.06</b>  | 1.38         | 1.92 | <b>3.01</b>  | 2.63         | 1.54         | <b>3.37</b>  | 0.93         | <b>4.12</b>  | <b>11.97</b> | 2.36         | 0.93         | 1.54         | <b>11.30</b> |
|                                                                   | <b>4.40</b>  | 1.23         | <b>13.18</b> | <b>3.32</b>  | 0.41         | <b>8.63</b>  | 0.72         | <b>7.18</b>  | <b>7.05</b>  | <b>3.58</b>  | <b>4.82</b>  | 2.07         | 2.25 | 2.74         | 2.44         | 1.41         | <b>3.57</b>  | <b>7.04</b>  | <b>6.16</b>  | <b>6.99</b>  | <b>3.46</b>  | 1.22         | 1.39         | <b>4.75</b>  |
|                                                                   | 0.25         | 0.26         | 0.65         | 0.27         | 0.15         | 0.06         | 0.18         | 1.05         | 1.21         | <b>92.35</b> | 0.38         | 0.13         | 0.24 | 0.33         | 0.37         | 0.36         | 0.29         | 0.03         | 0.30         | 0.23         | 0.22         | 0.26         | 0.10         | 0.36         |
|                                                                   | 0.06         | 0.02         | 0.07         | 0.10         | 0.18         | 0.65         | <b>43.31</b> | 0.04         | 0.02         | 0.13         | 0.09         | <b>53.58</b> | 0.13 | 0.07         | 0.19         | 0.01         | 0.03         | 0.09         | 0.00         | 0.21         | 0.02         | 0.00         | 0.13         | 0.88         |
|                                                                   | <b>3.88</b>  | 0.00         | 0.00         | 0.04         | <b>47.77</b> | 0.02         | 0.00         | 0.13         | 0.01         | 0.00         | 0.01         | 0.03         | 0.00 | 0.00         | 0.08         | 0.04         | 0.02         | 0.00         | 0.03         | 0.01         | 0.00         | 0.03         | <b>47.86</b> | 0.03         |
|                                                                   | 0.05         | 0.07         | 0.13         | 0.05         | 0.04         | <b>91.75</b> | 0.15         | 0.01         | 0.16         | 0.05         | 0.00         | 0.05         | 0.05 | 0.02         | 0.03         | 0.10         | 0.01         | 0.12         | 0.02         | 0.31         | 0.03         | 0.00         | 0.02         | <b>6.79</b>  |

In bold values greater than 3%. Rows represent breed and columns the 24 group ancestries.

Supplementary Fig. S1. Individual pig ancestries at K=24.

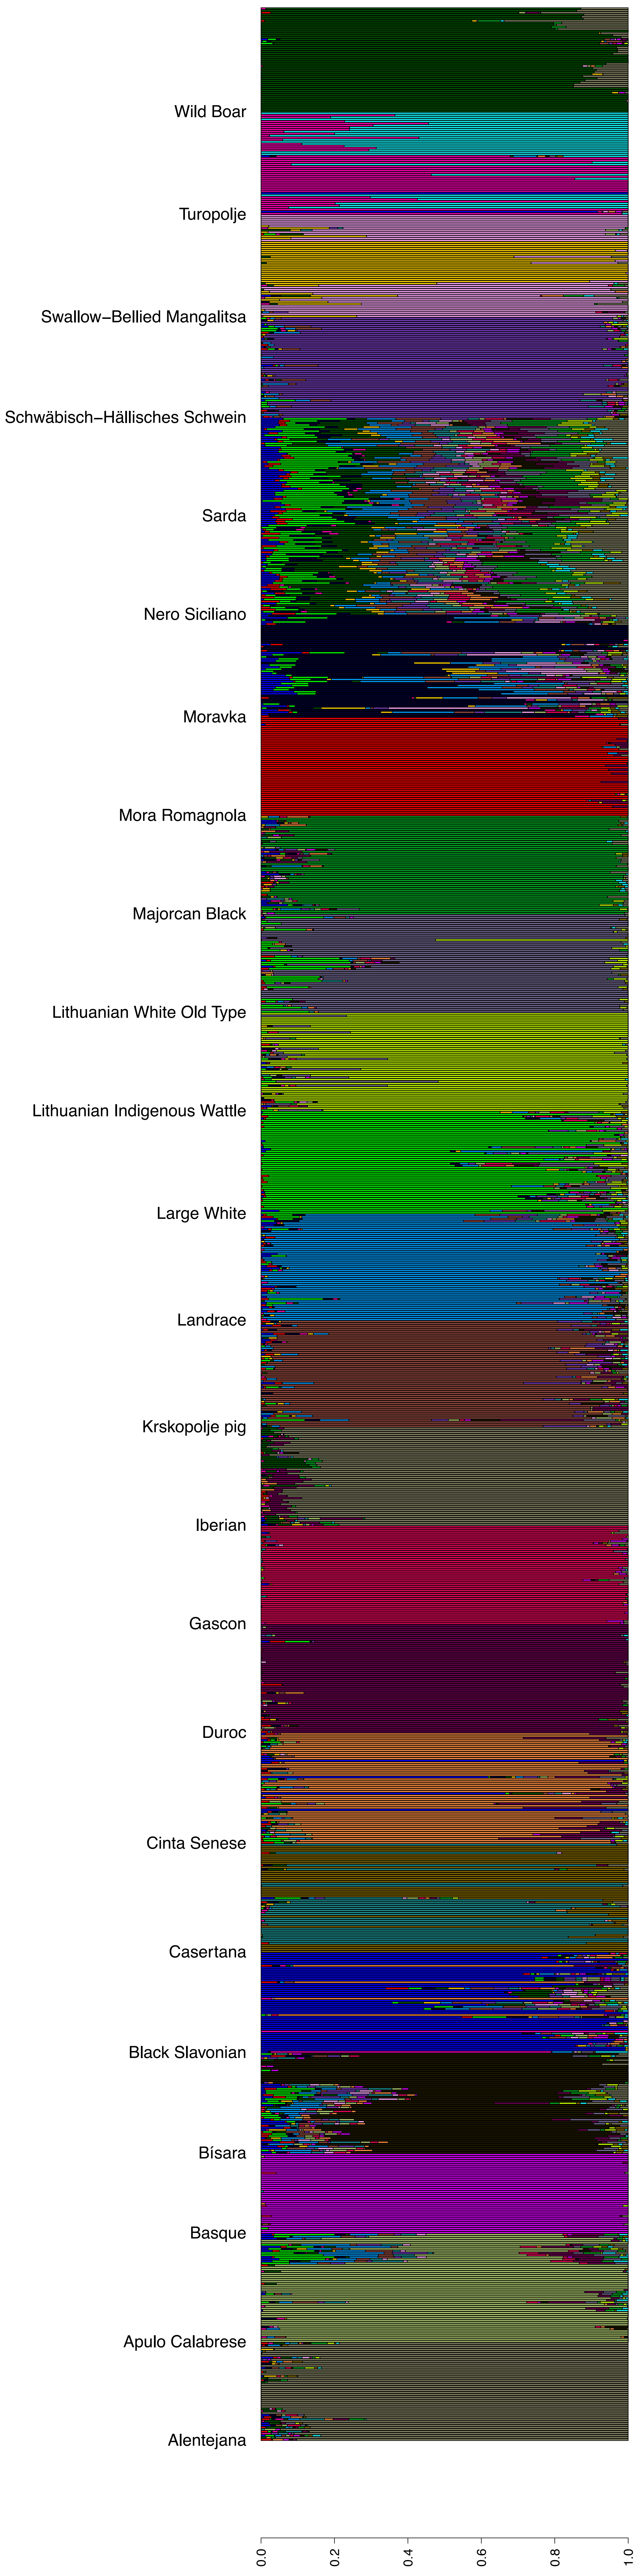

**Supplementary Fig. S2. Change of average admixture ancestries per breed from K=2 to 24.**

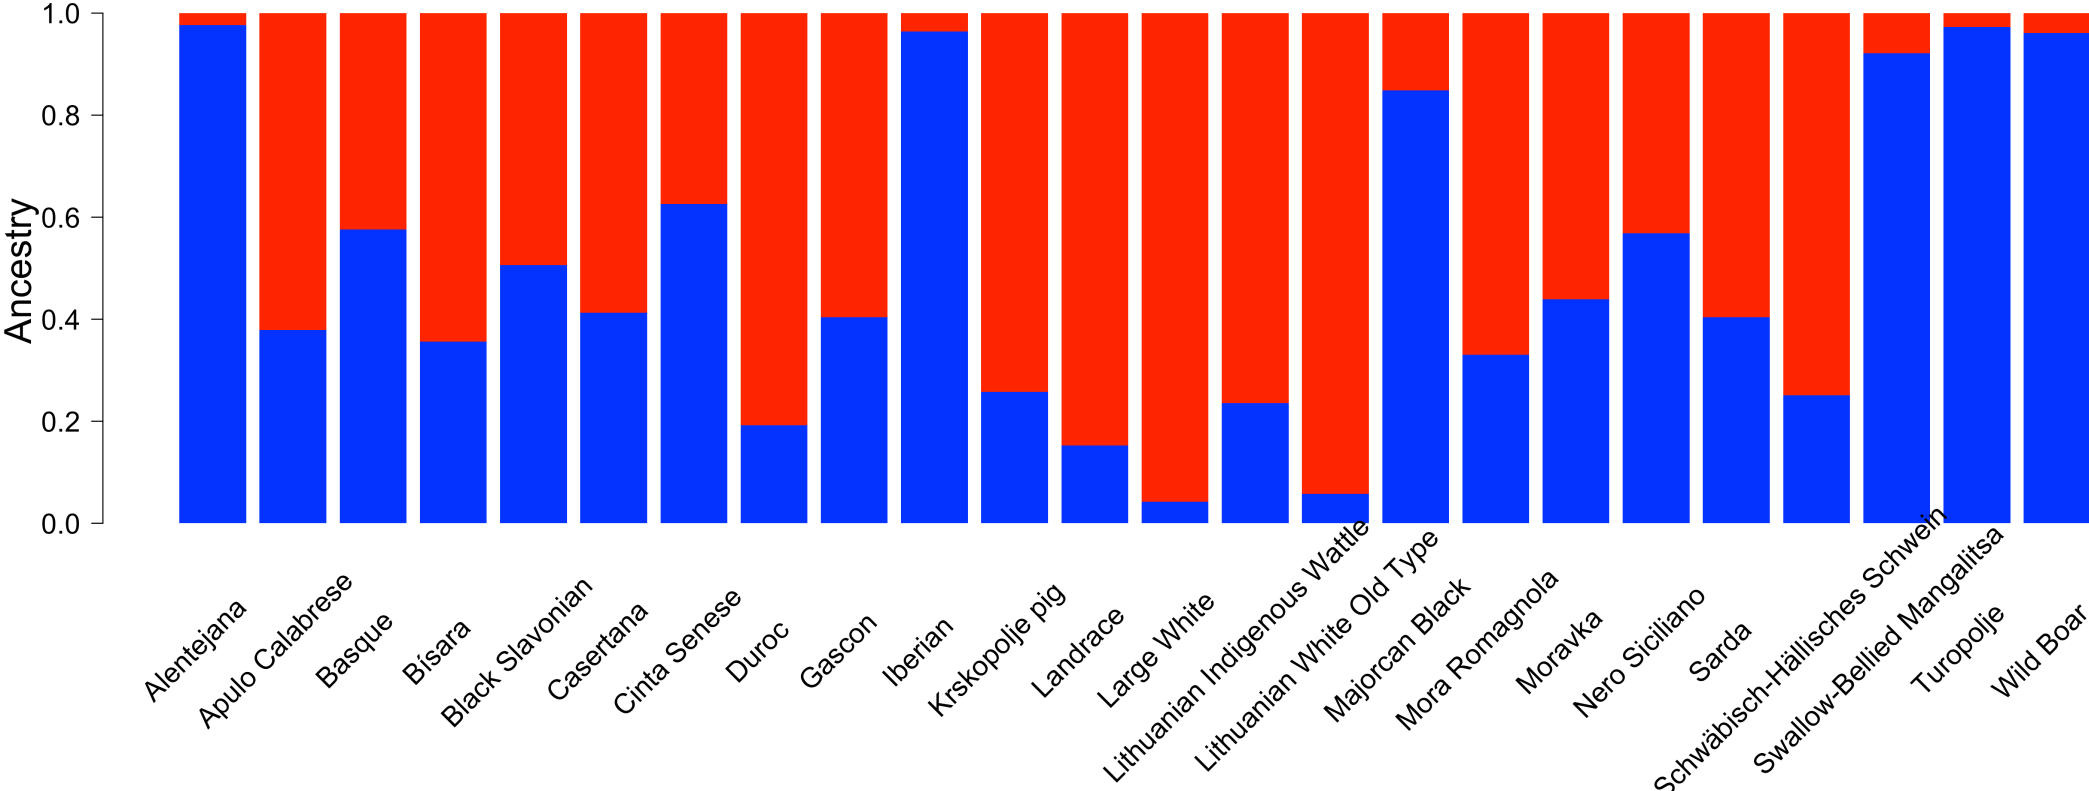

**Supplementary Fig. S2. Change of average admixture ancestries per breed from K=3 to 24.**

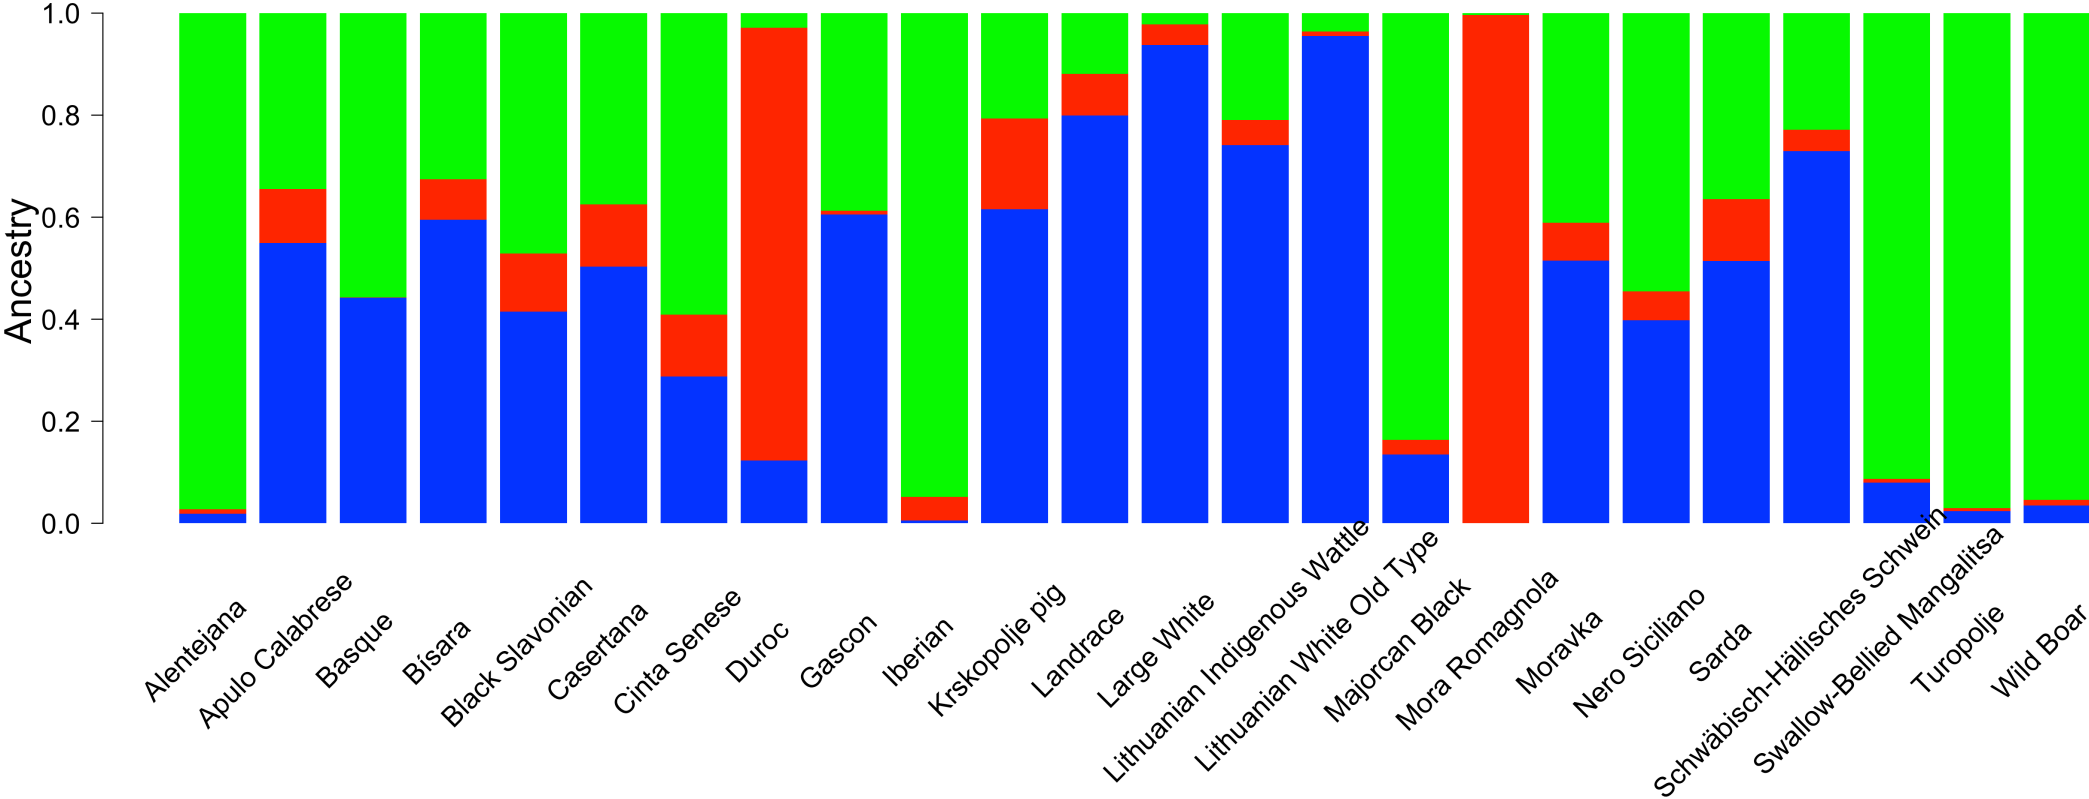

**Supplementary Fig. S2. Change of average admixture ancestries per breed from K=4 to 24.**

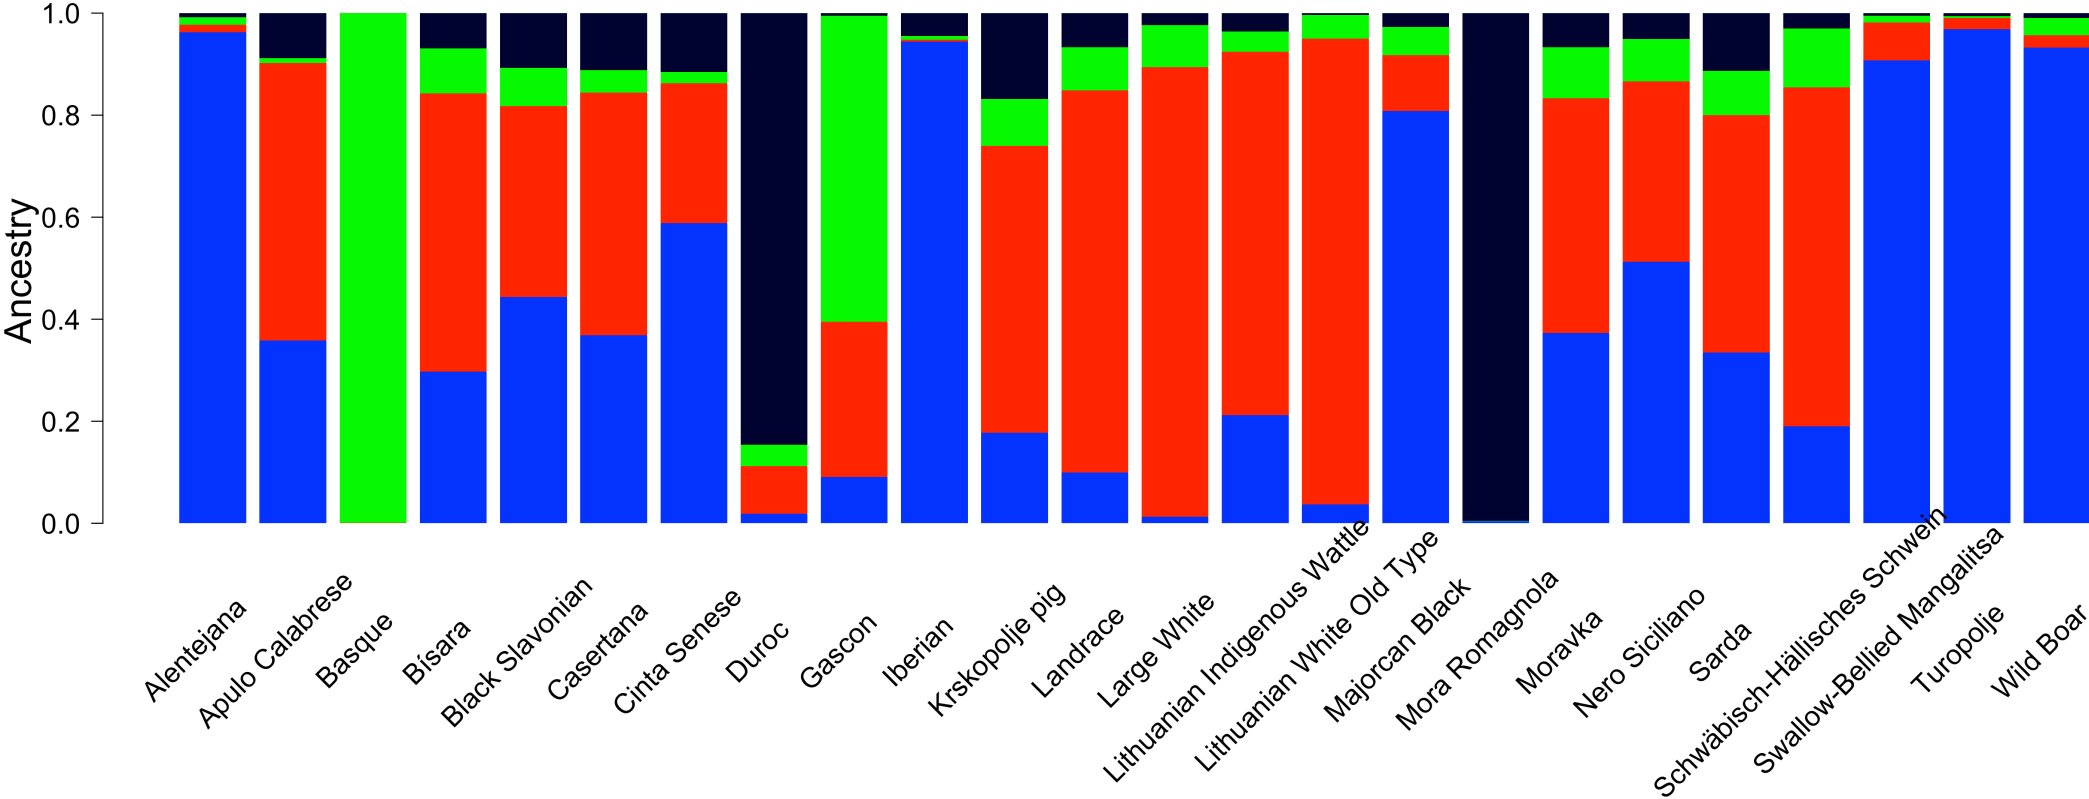

**Supplementary Fig. S2. Change of average admixture ancestries per breed from K=5 to 24.**

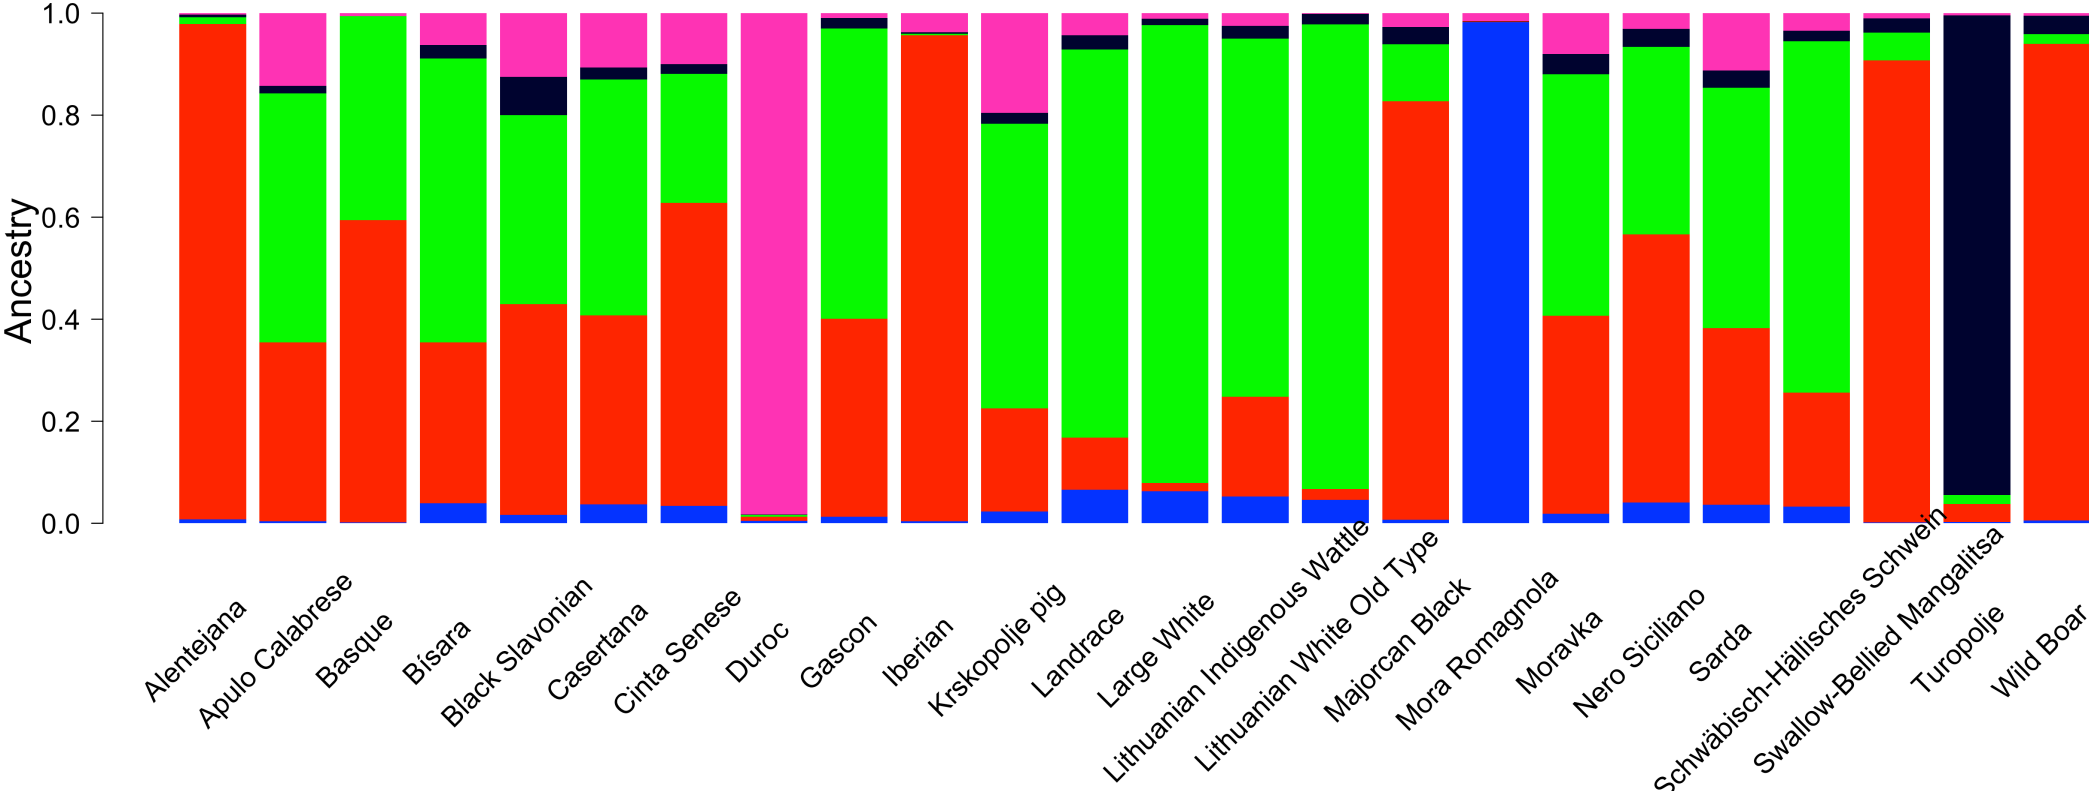

**Supplementary Fig. S2. Change of average admixture ancestries per breed from K=6 to 24.**

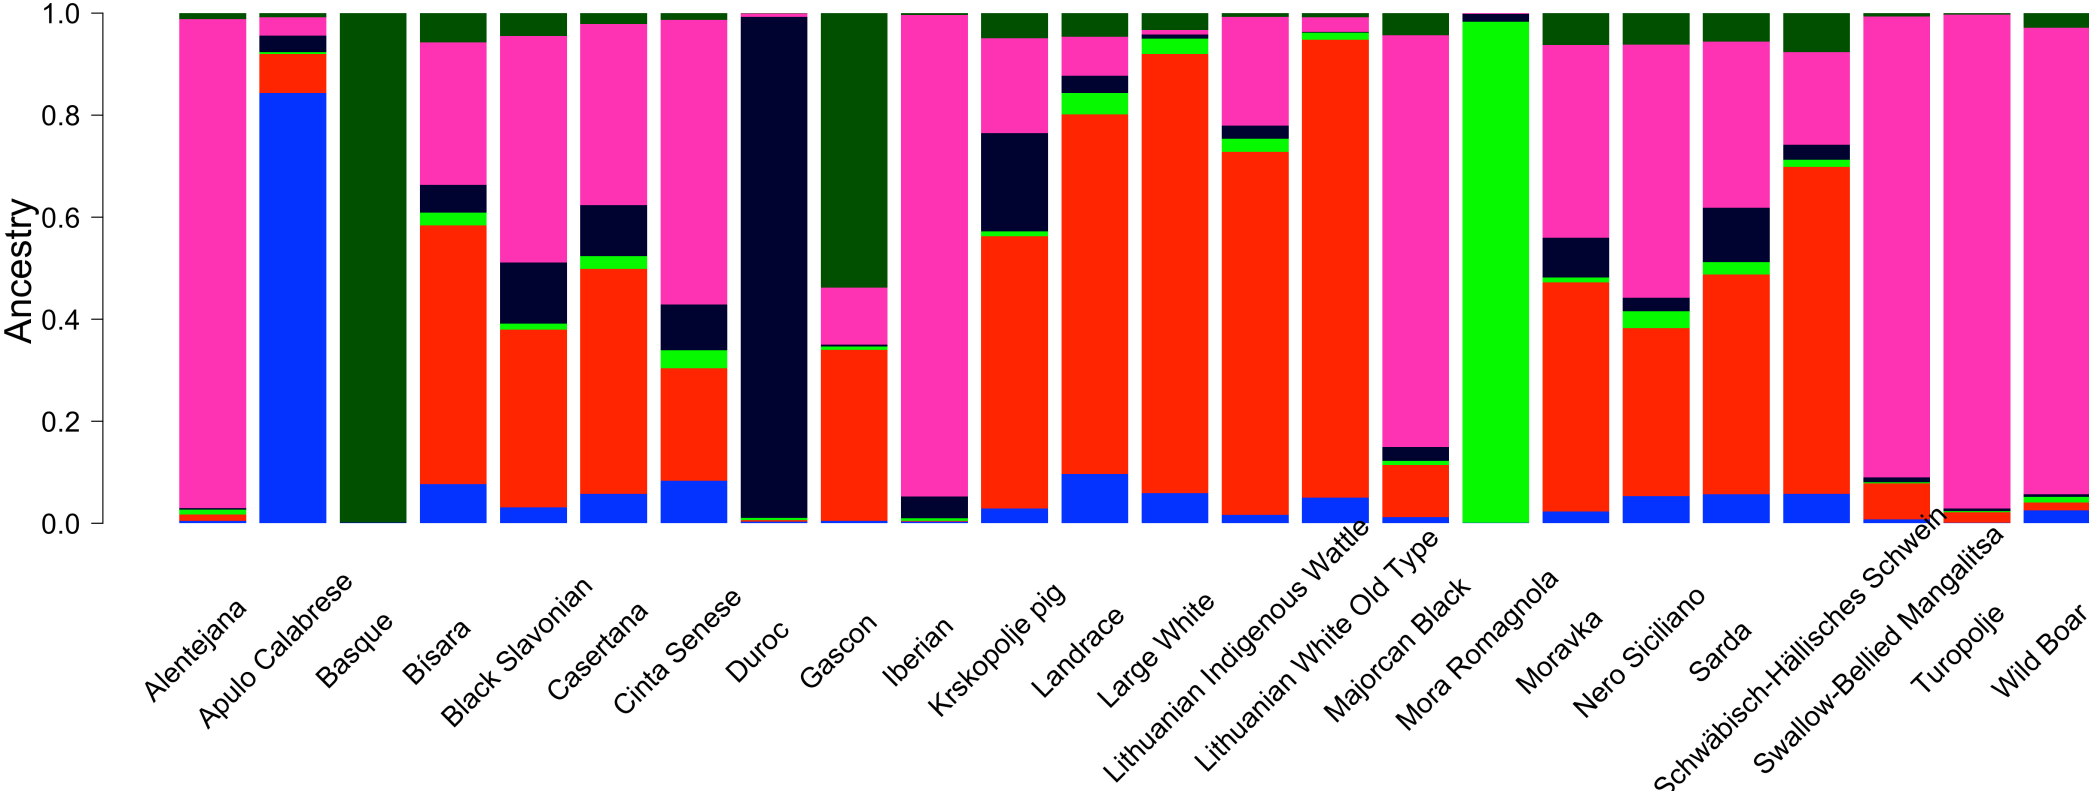





**Supplementary Fig. S2. Change of average admixture ancestries per breed from K=8 to 24.**

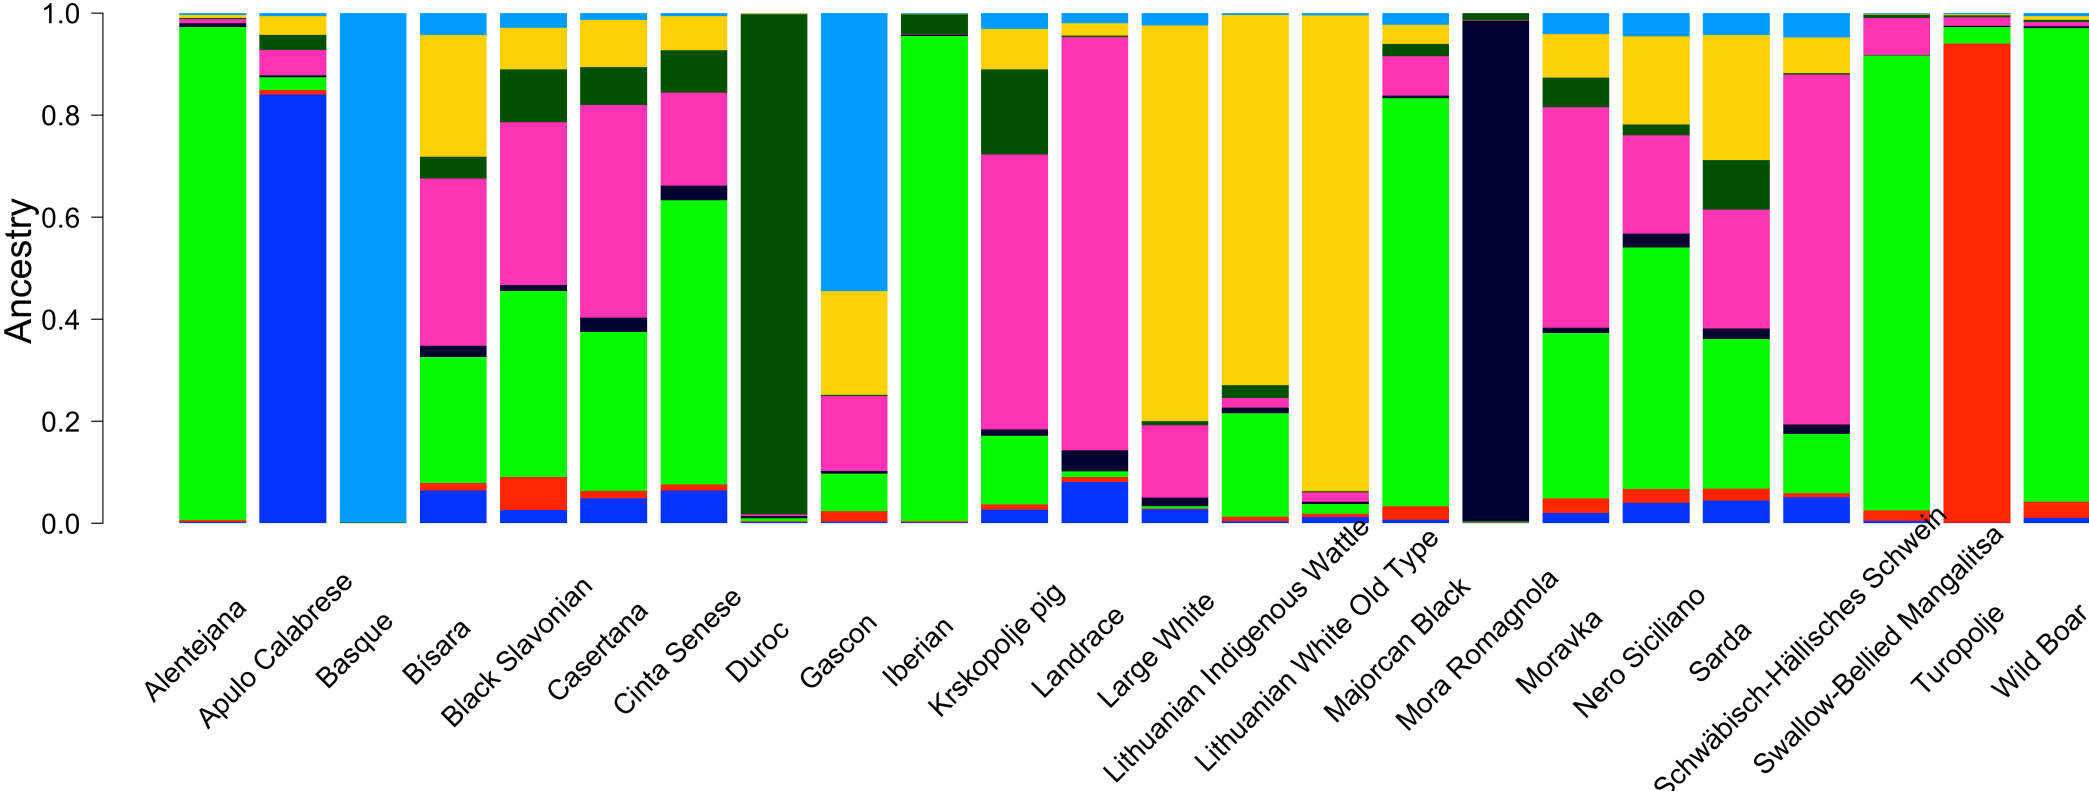



**Supplementary Fig. S2. Change of average admixture ancestries per breed from K=10 to 24.**

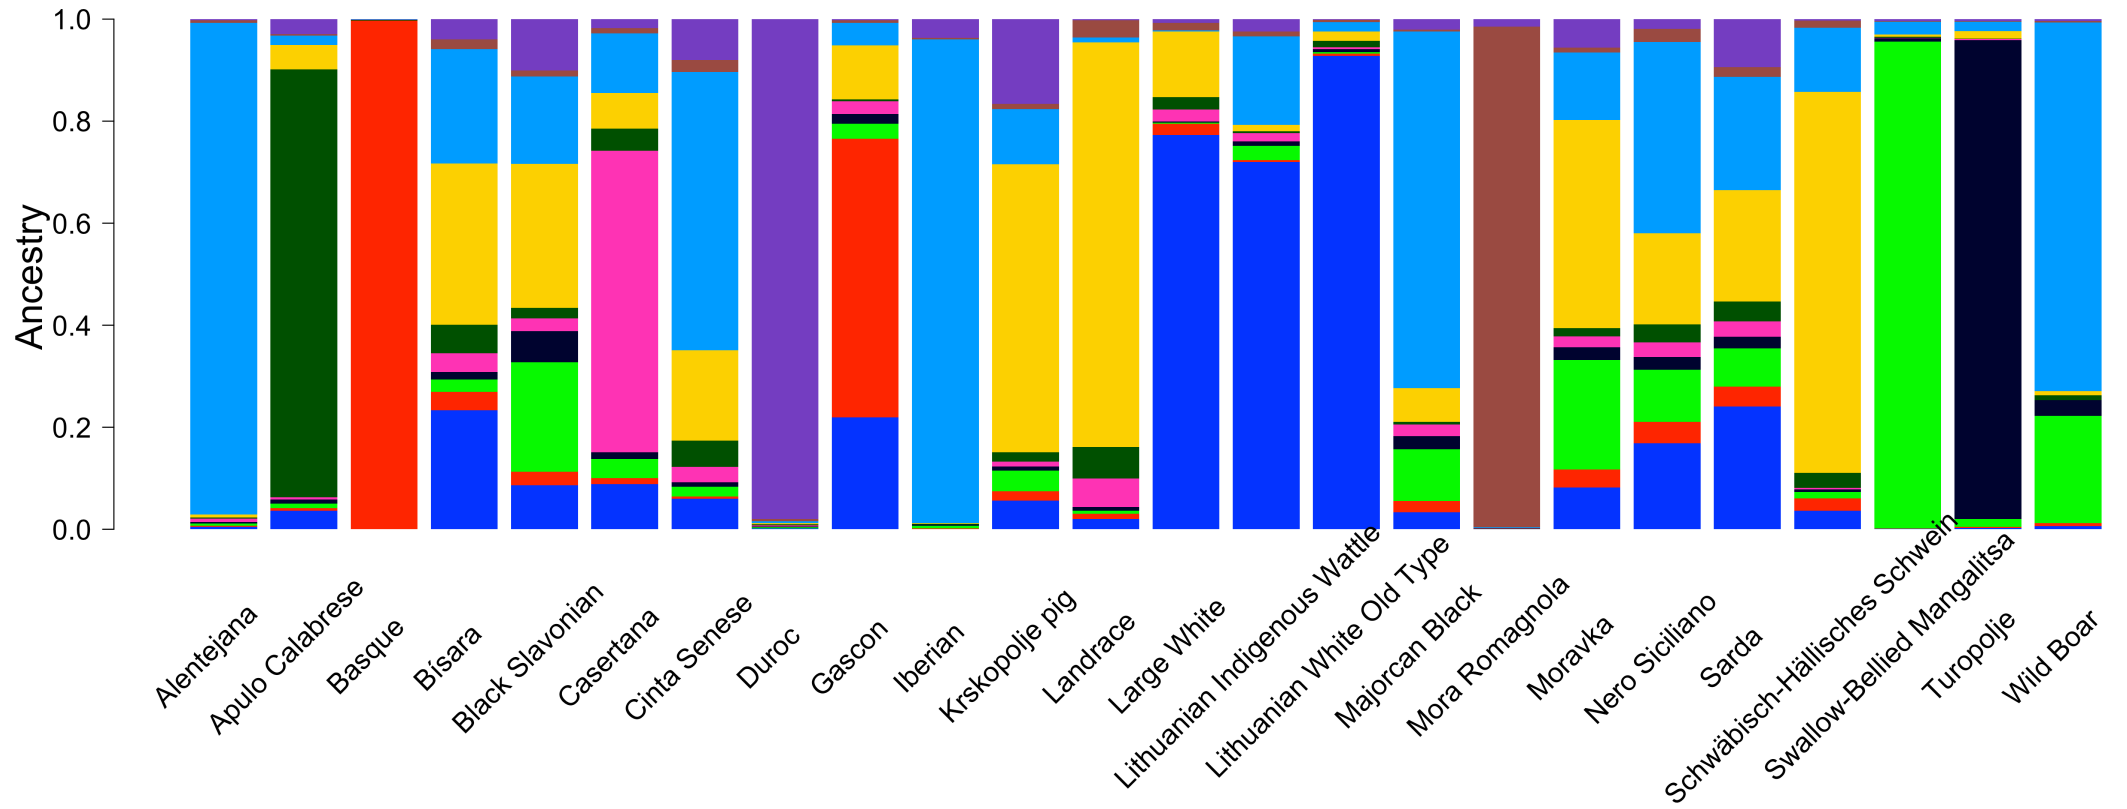

**Supplementary Fig. S2. Change of average admixture ancestries per breed from K=11 to 24.**

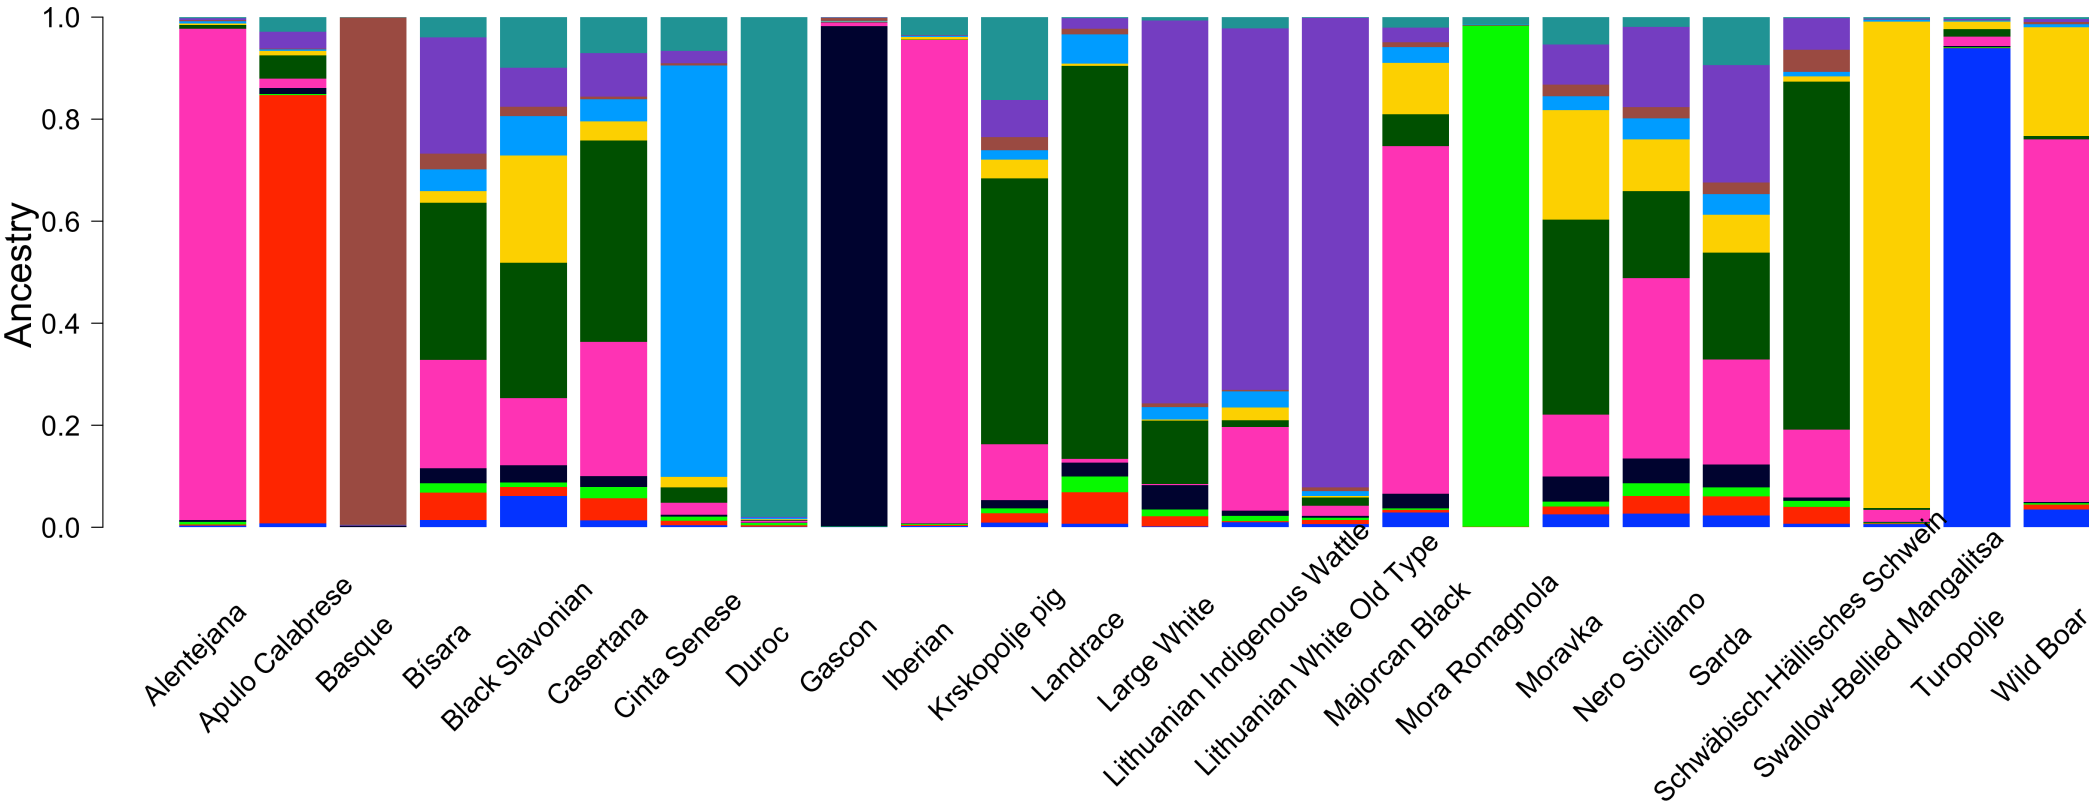

**Supplementary Fig. S2. Change of average admixture ancestries per breed from K=12 to 24.**

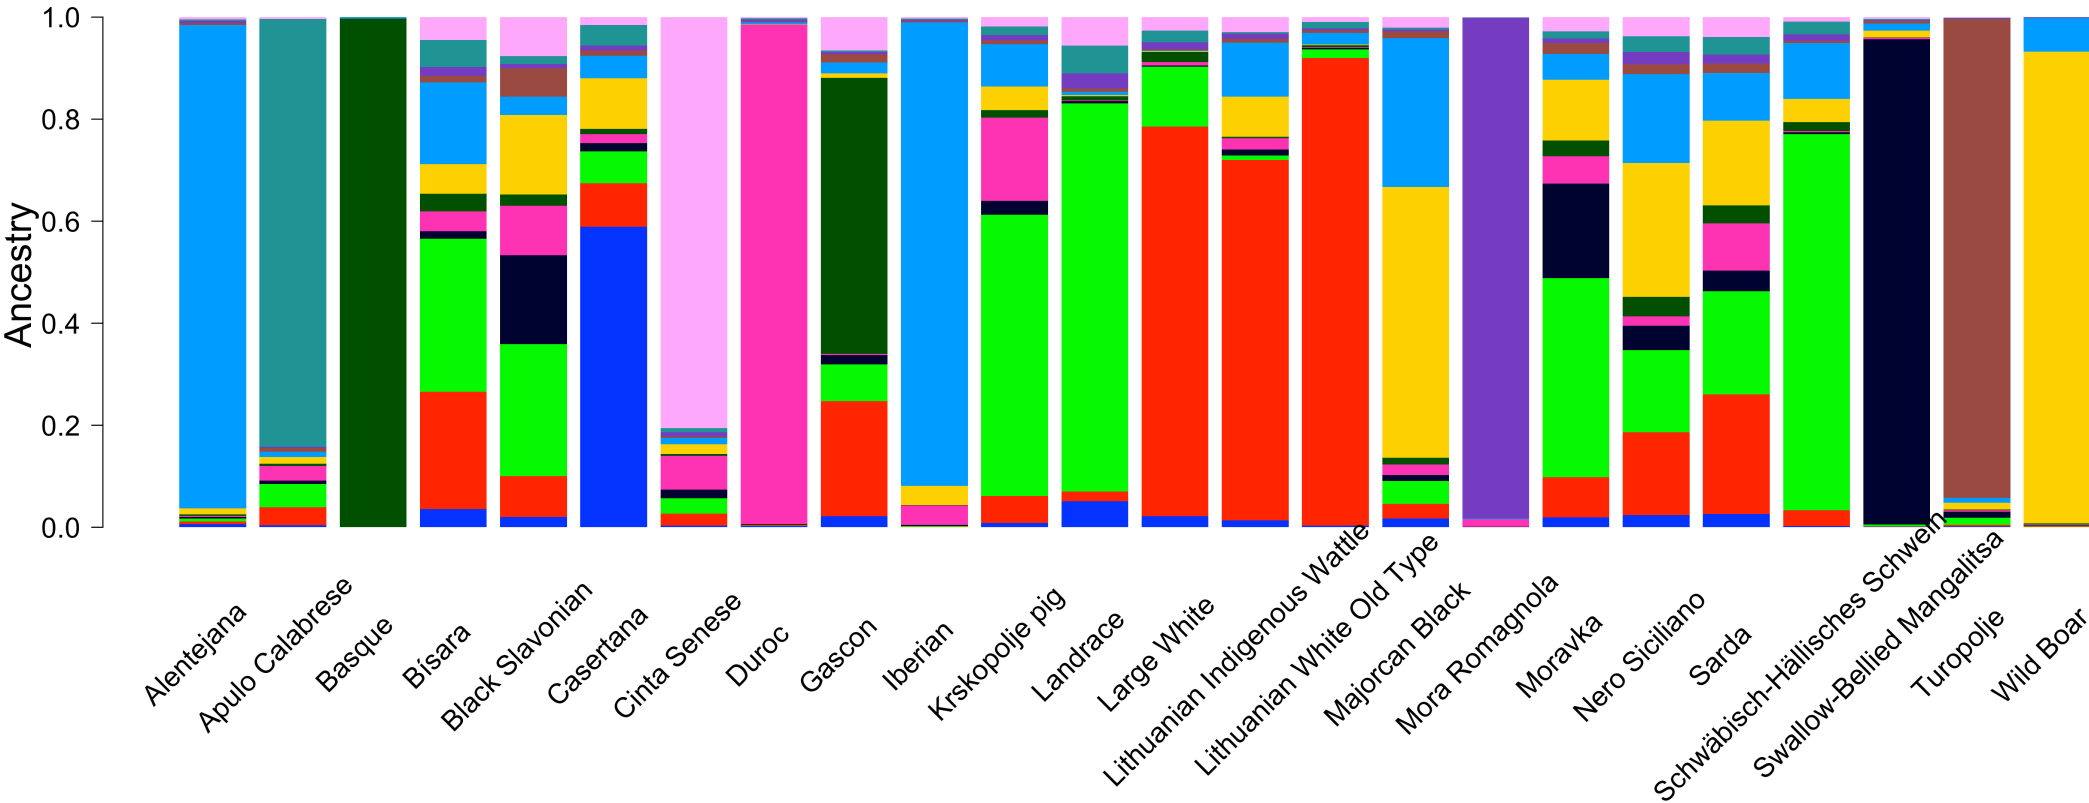

**Supplementary Fig. S2. Change of average admixture ancestries per breed from K=13 to 24.**

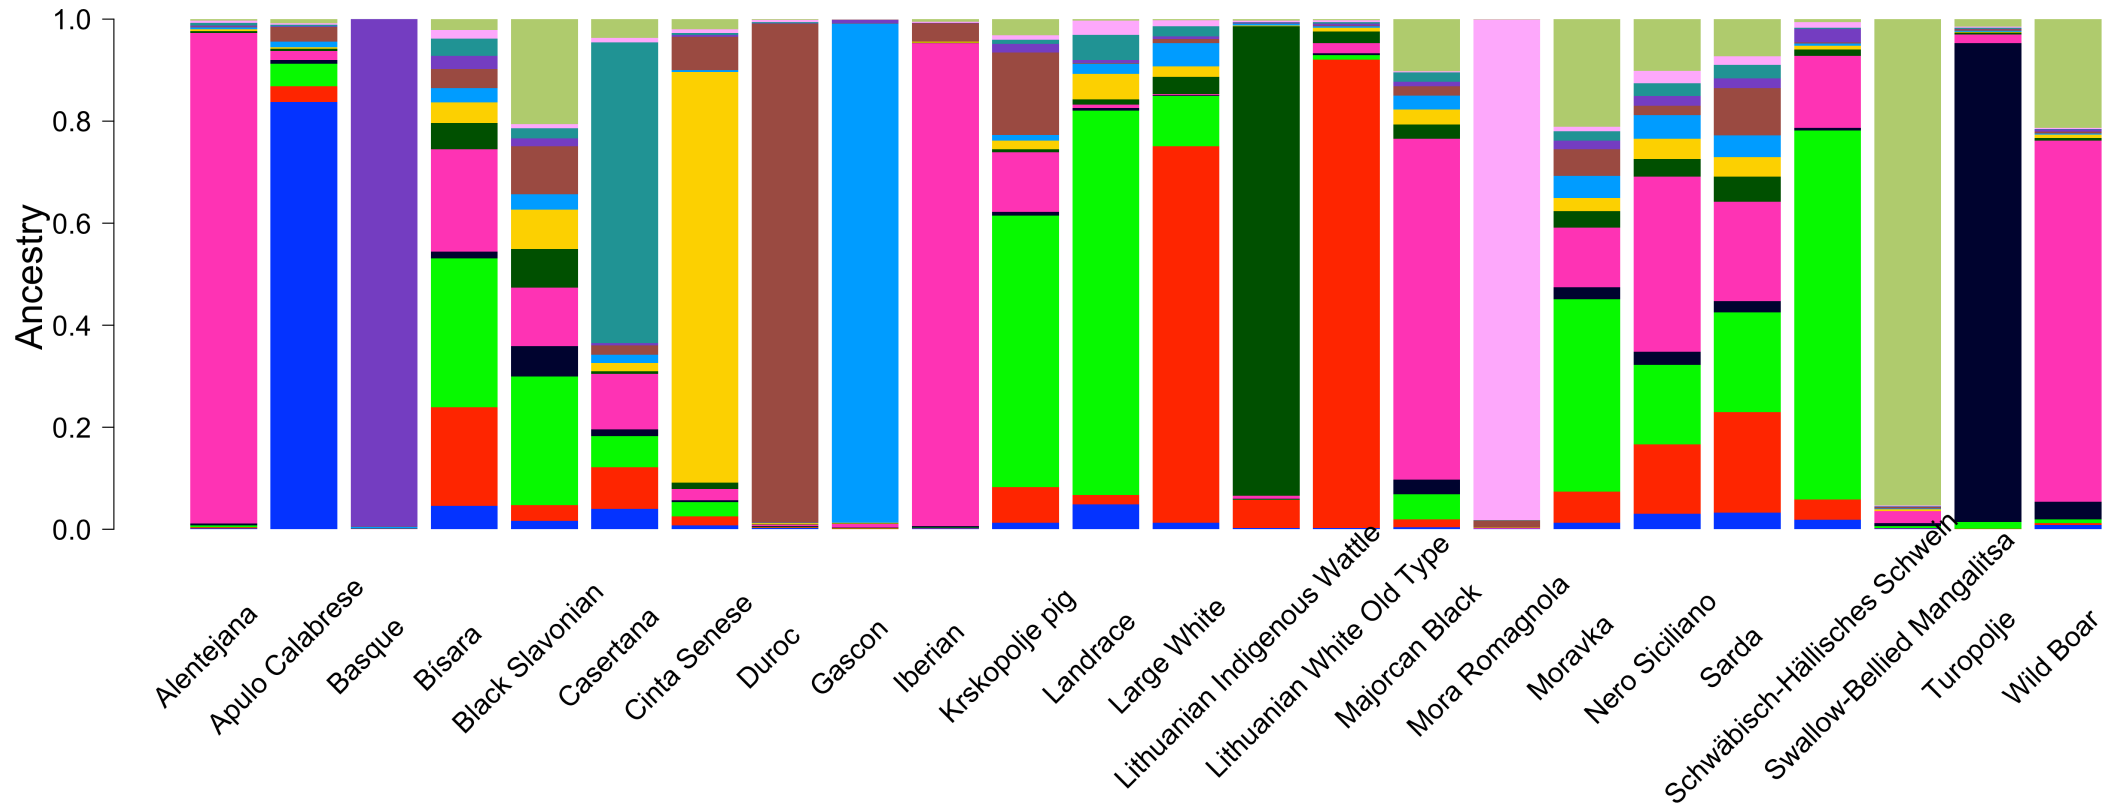

**Supplementary Fig. S2. Change of average admixture ancestries per breed from K=14 to 24.**

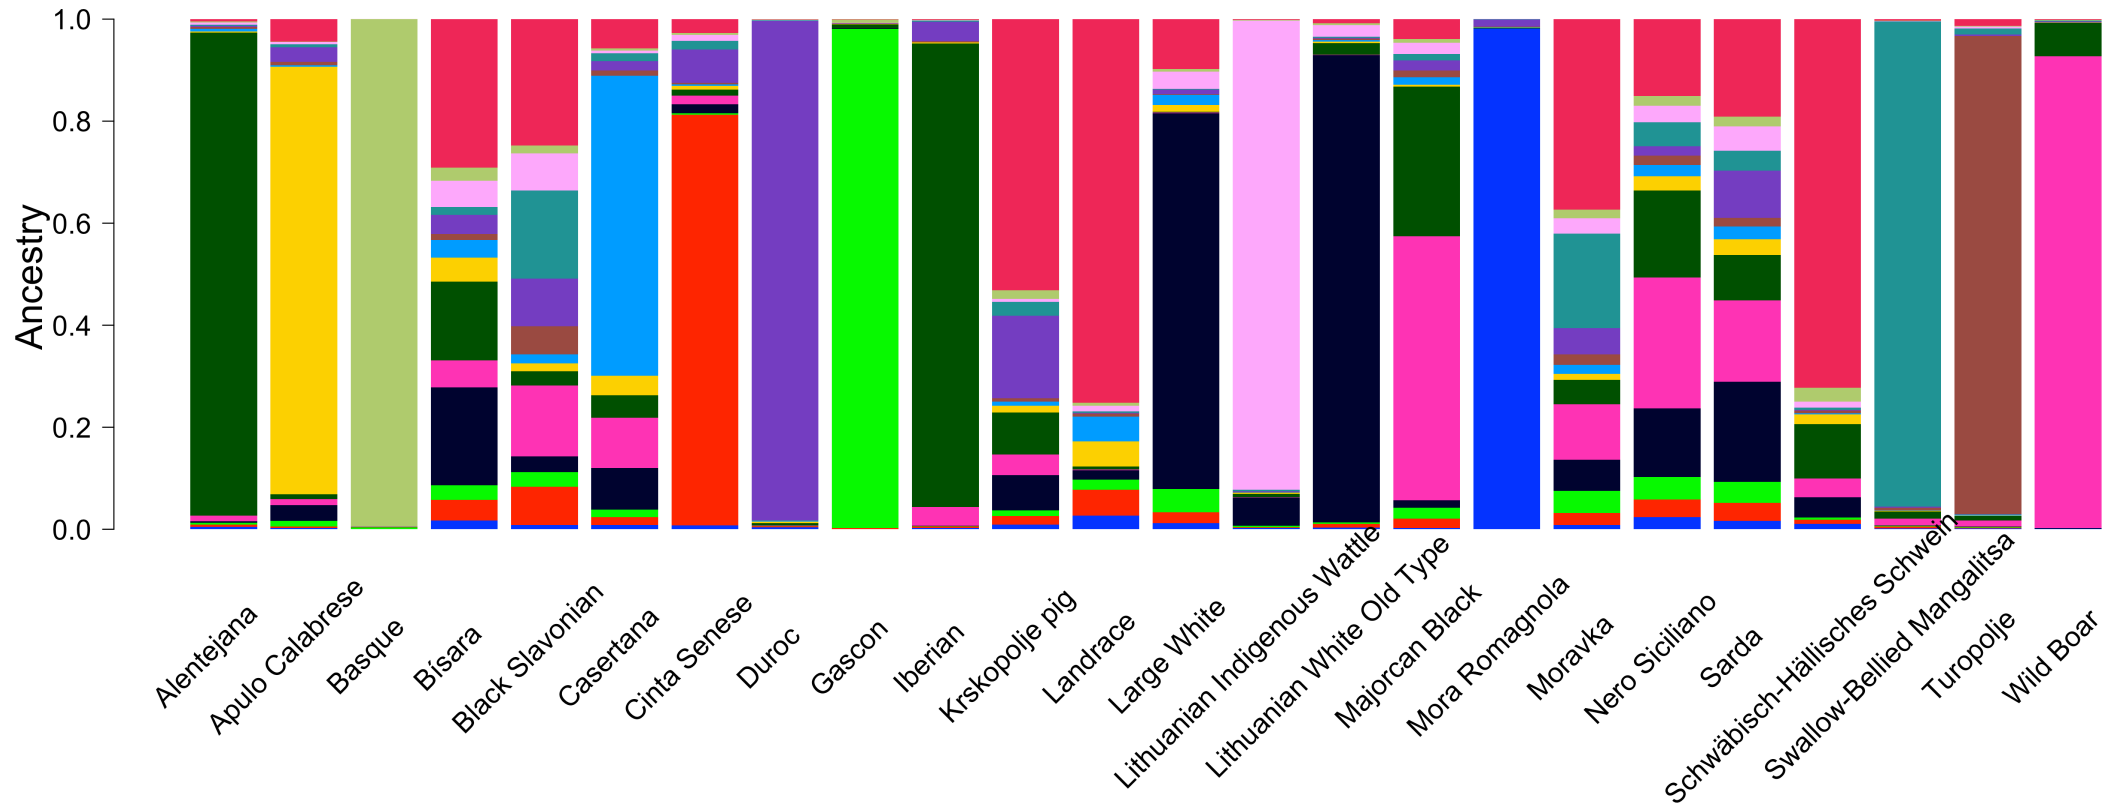



**Supplementary Fig. S2. Change of average admixture ancestries per breed from K=15 to 24.**

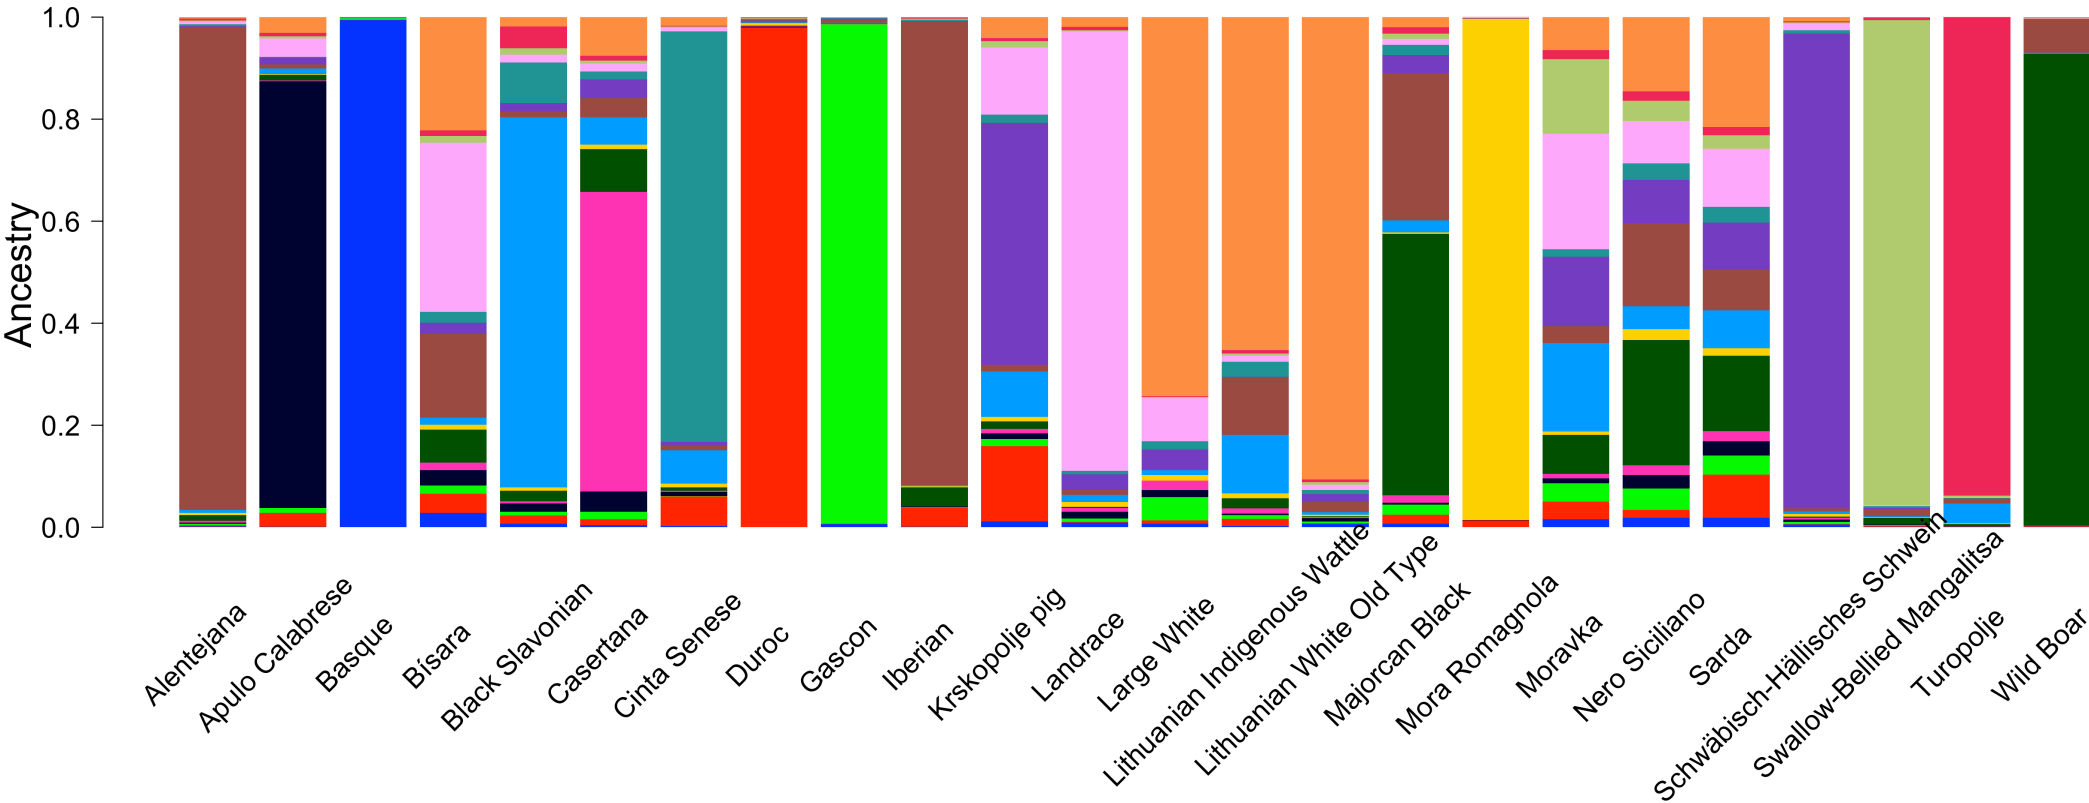

**Supplementary Fig. S2. Change of average admixture ancestries per breed from K=16 to 24.**

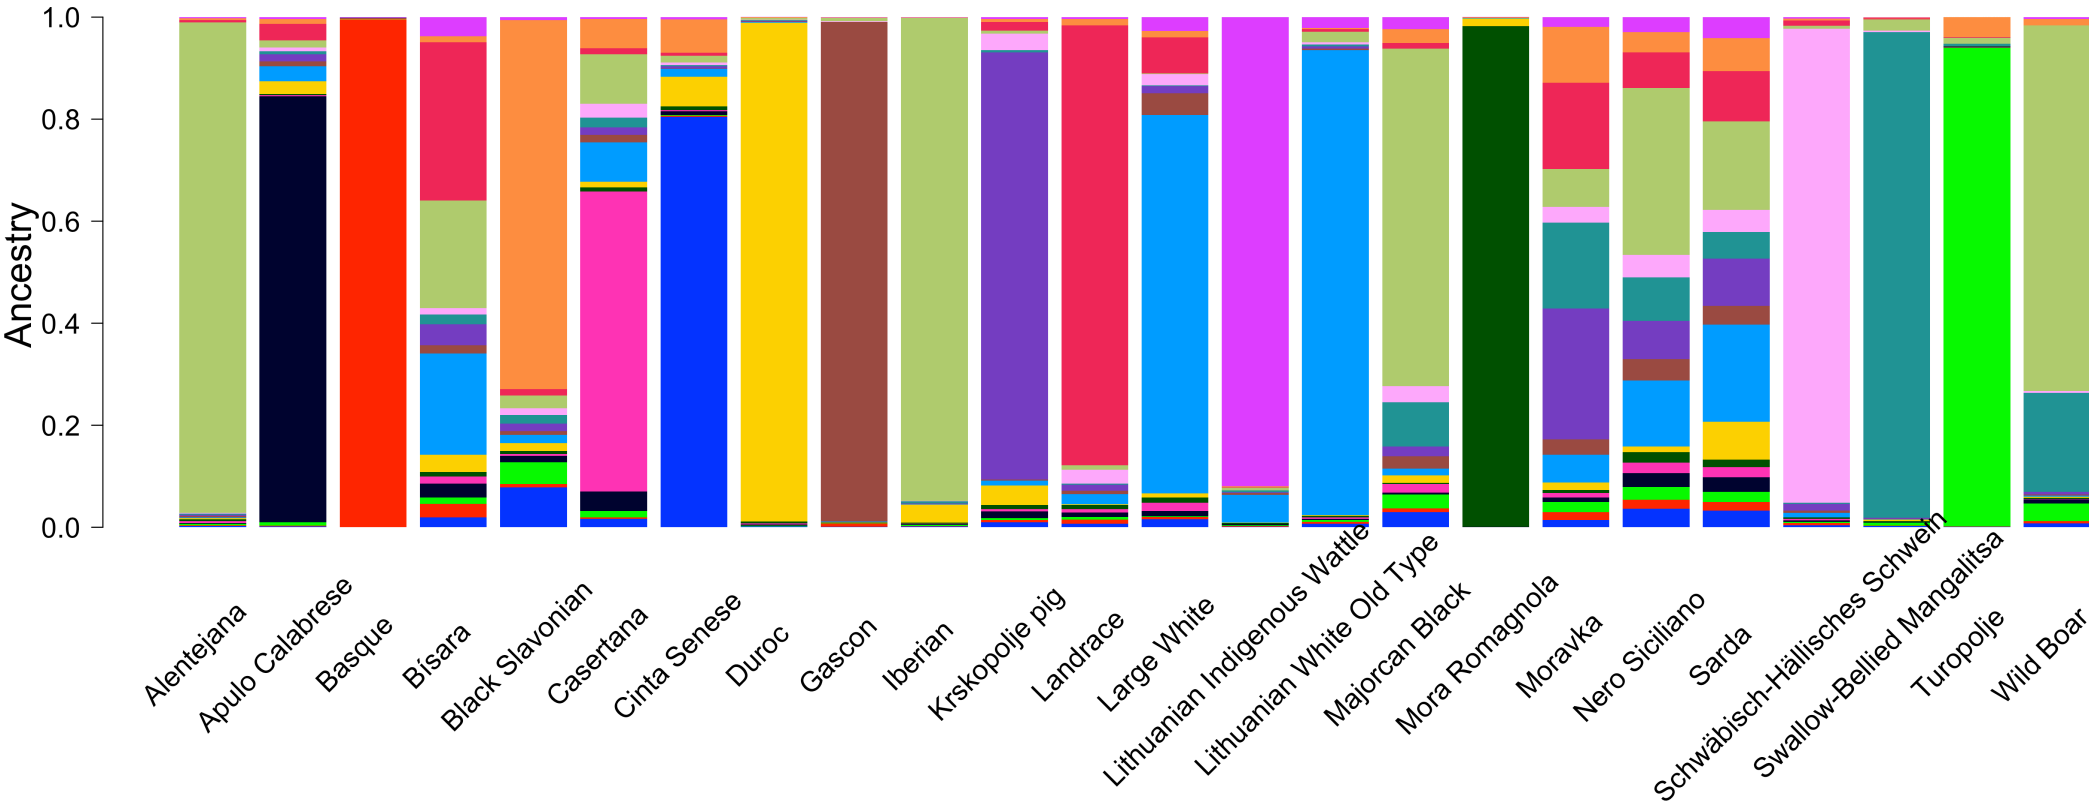

**Supplementary Fig. S2. Change of average admixture ancestries per breed from K=17 to 24.**

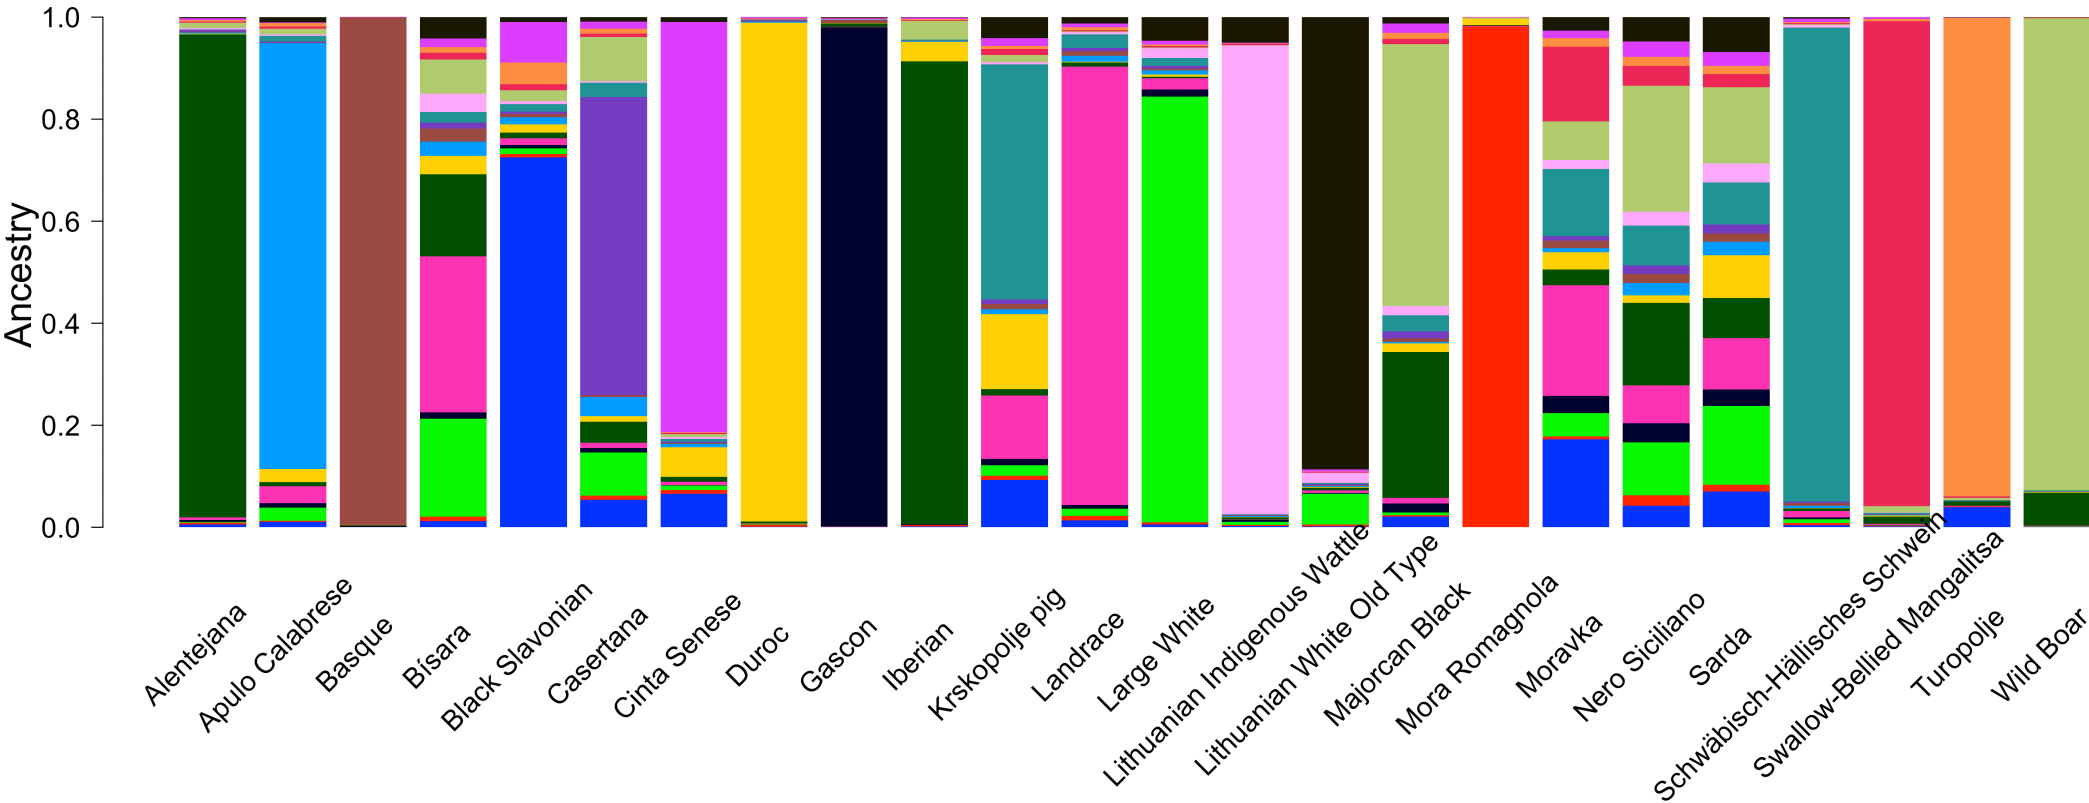

**Supplementary Fig. S2. Change of average admixture ancestries per breed from K=18 to 24.**

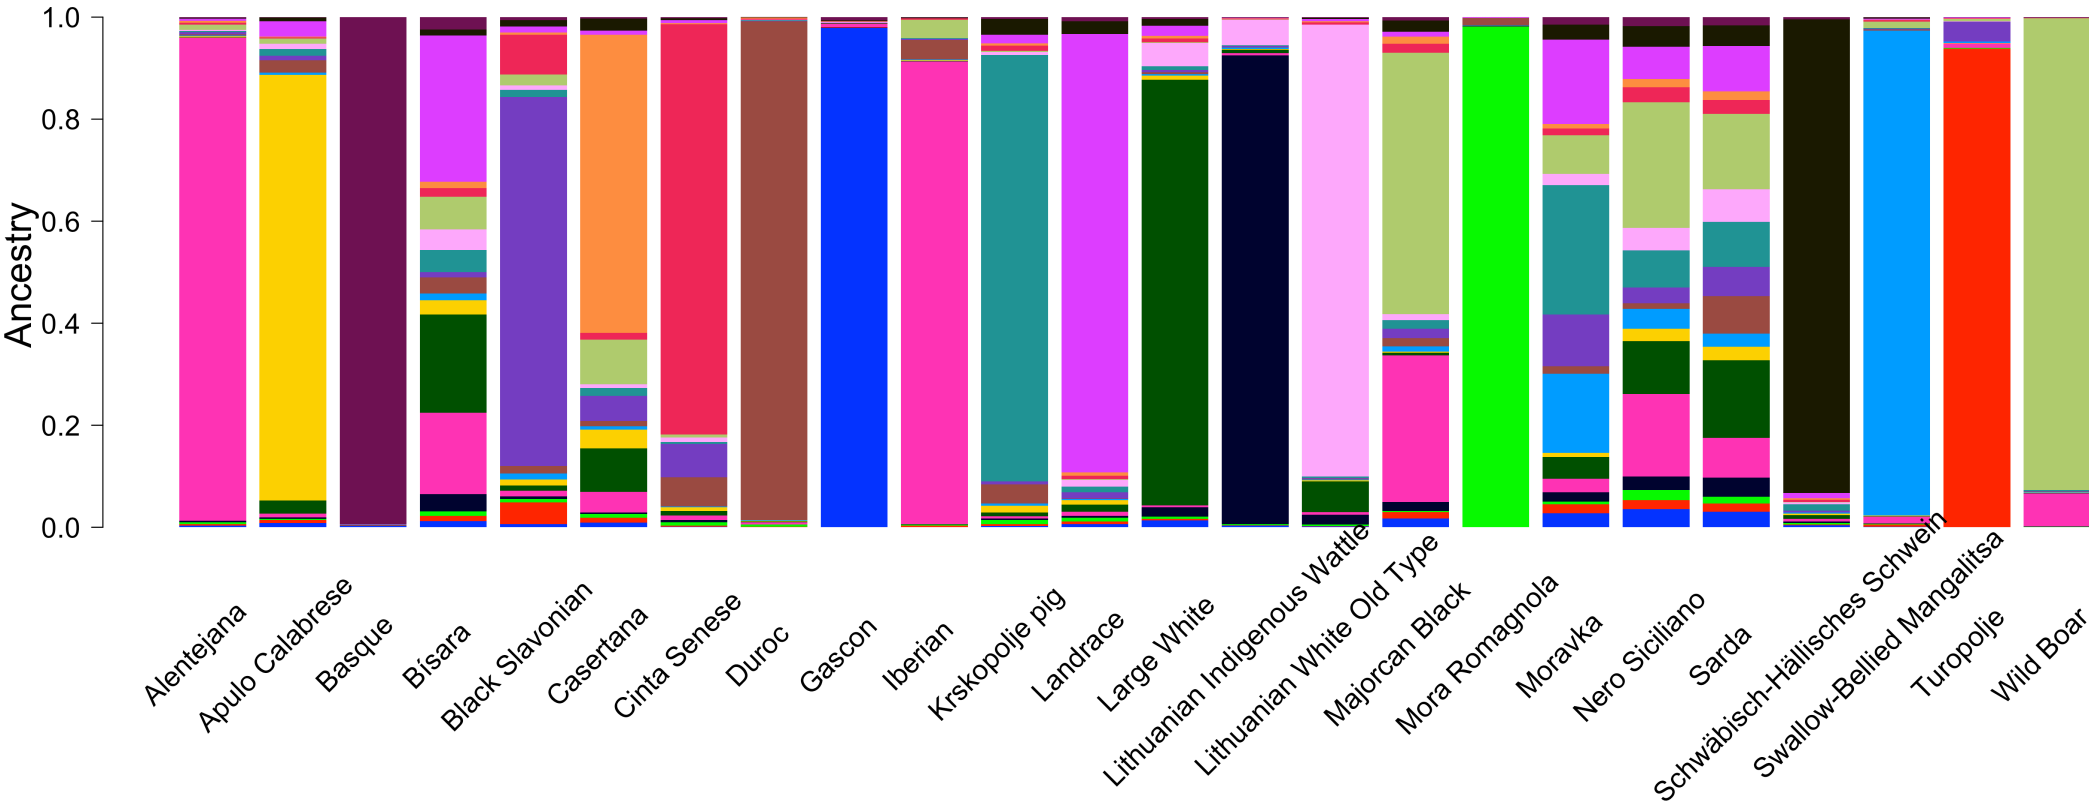

**Supplementary Fig. S2. Change of average admixture ancestries per breed from K=19 to 24.**

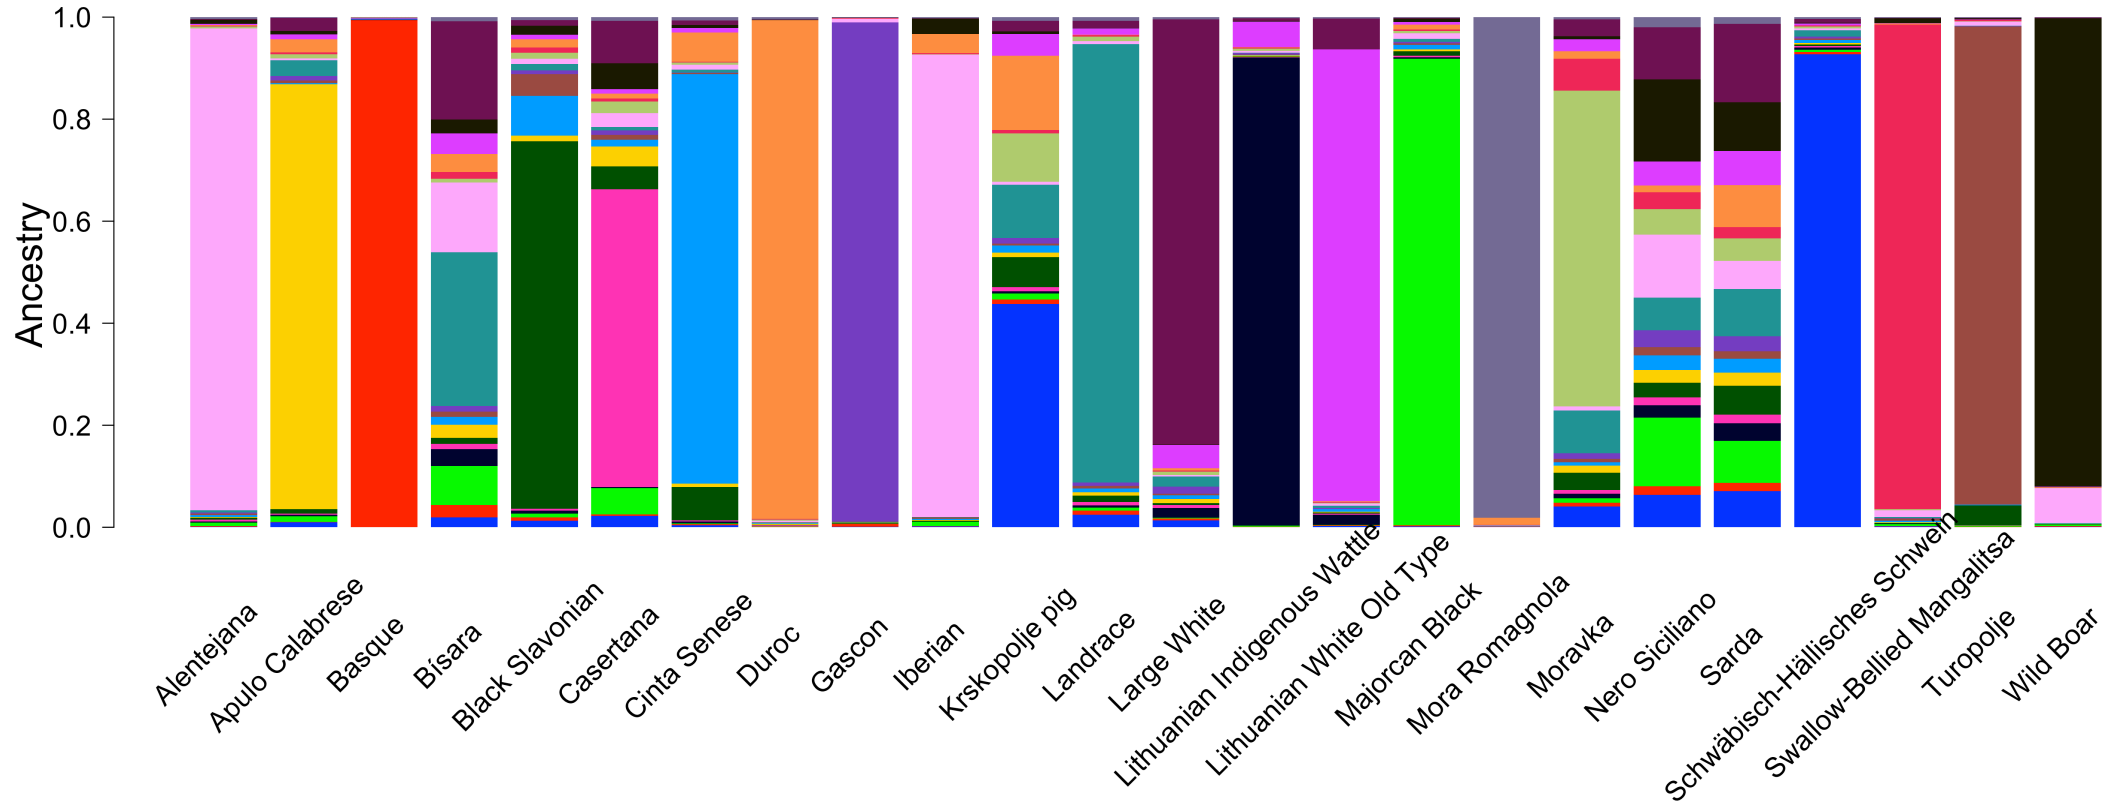

**Supplementary Fig. S2. Change of average admixture ancestries per breed from K=20 to 24.**

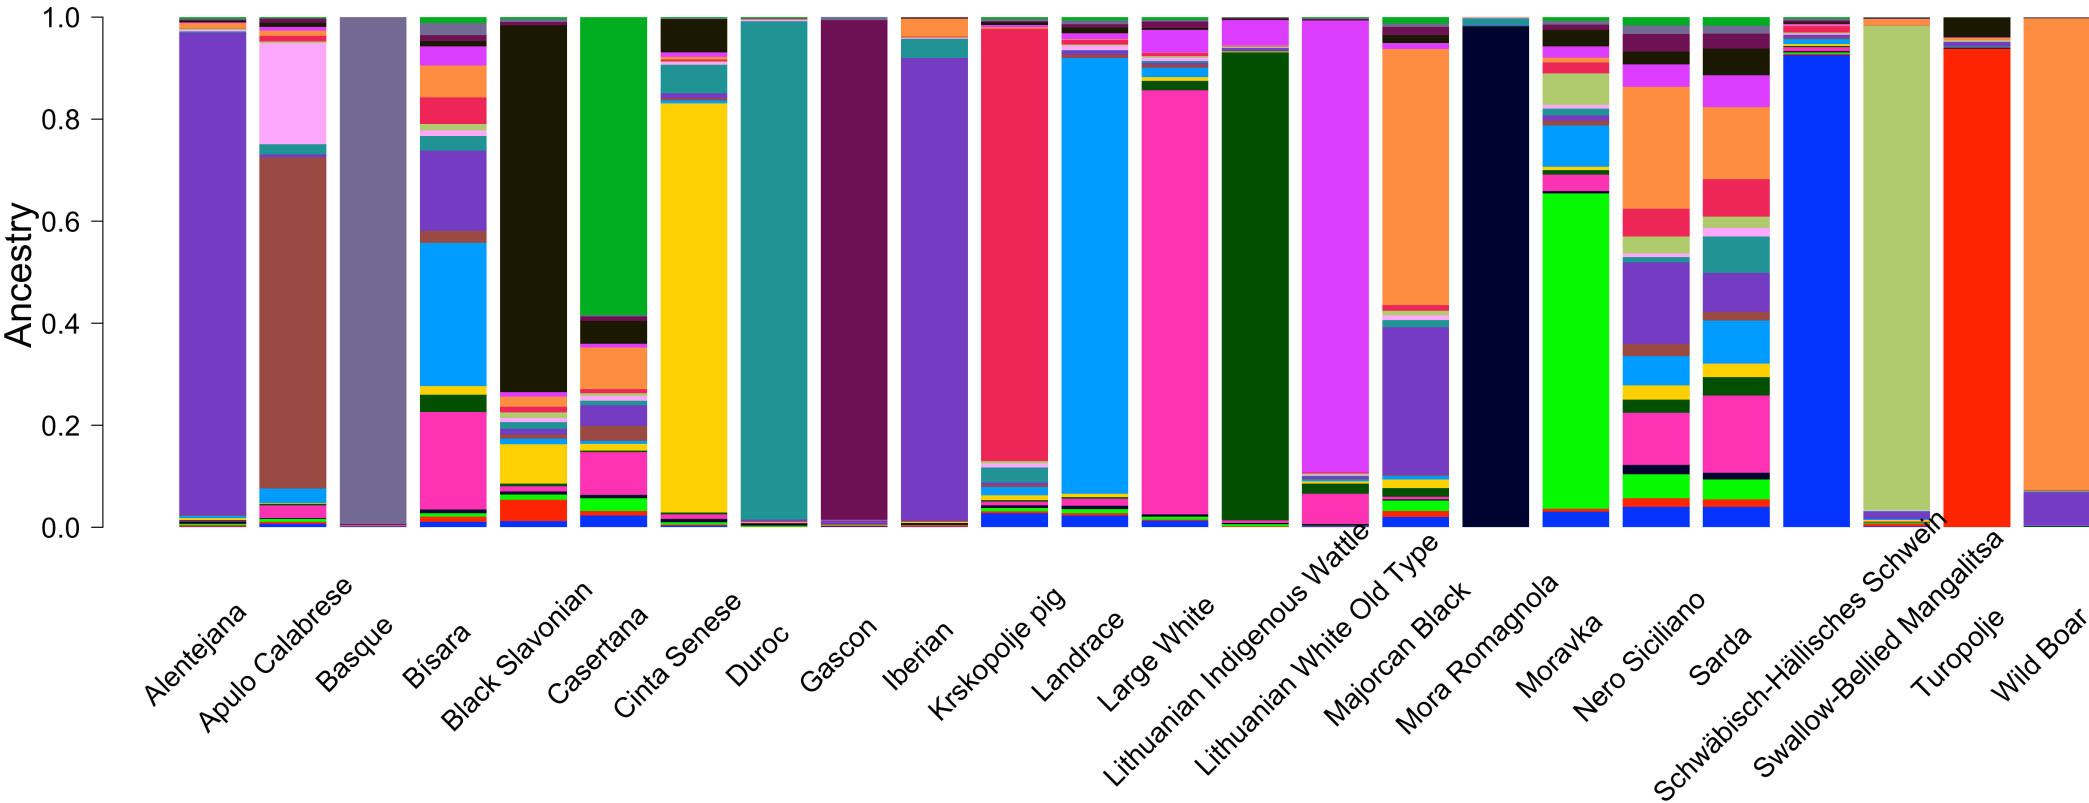

**Supplementary Fig. S2. Change of average admixture ancestries per breed from K=21 to 24.**

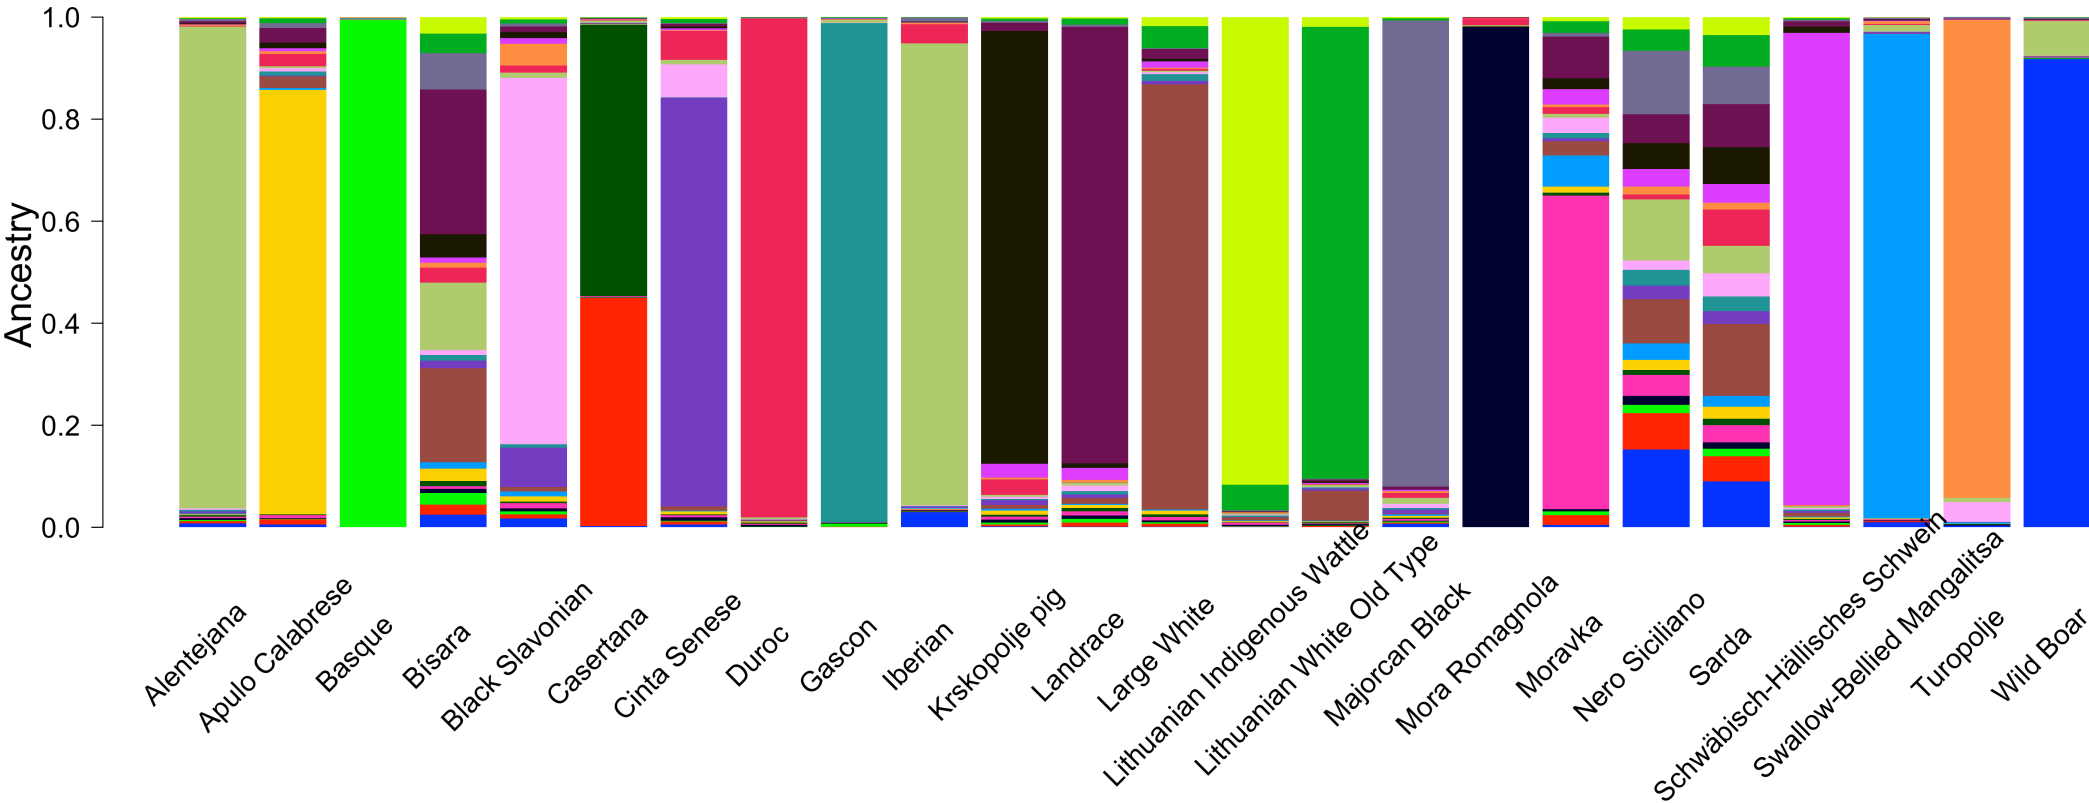

**Supplementary Fig. S2. Change of average admixture ancestries per breed from K=22 to 24.**

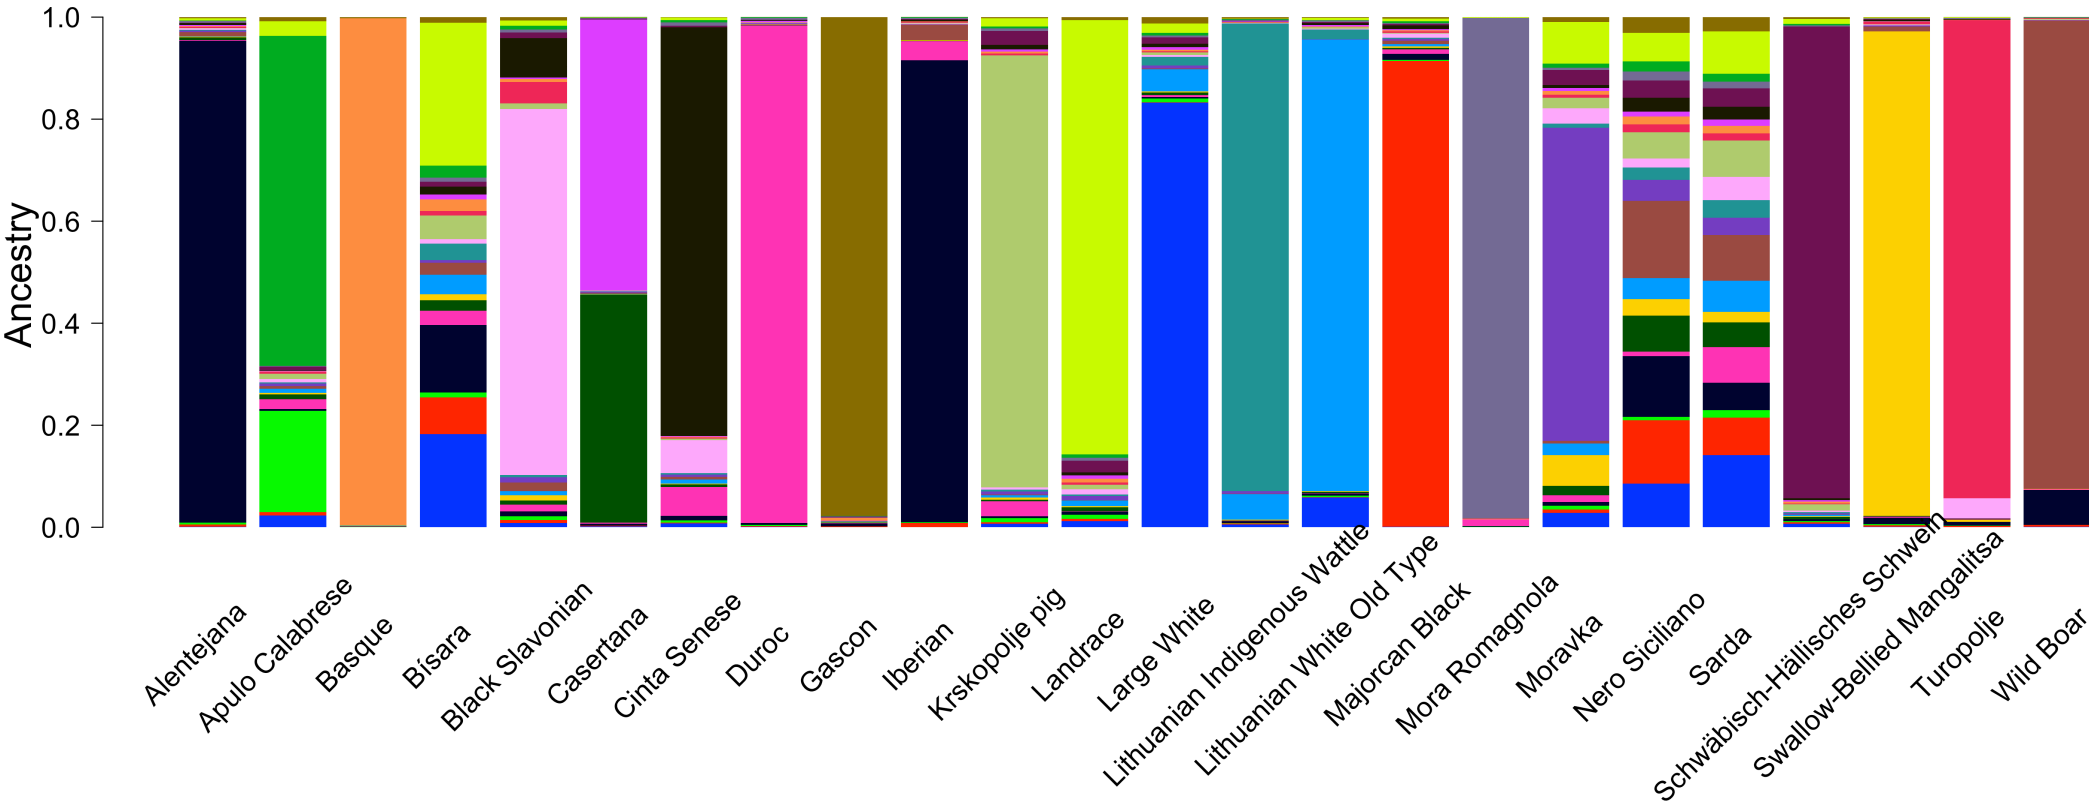



**Supplementary Fig. S2. Change of average admixture ancestries per breed from K=23 to 24.**

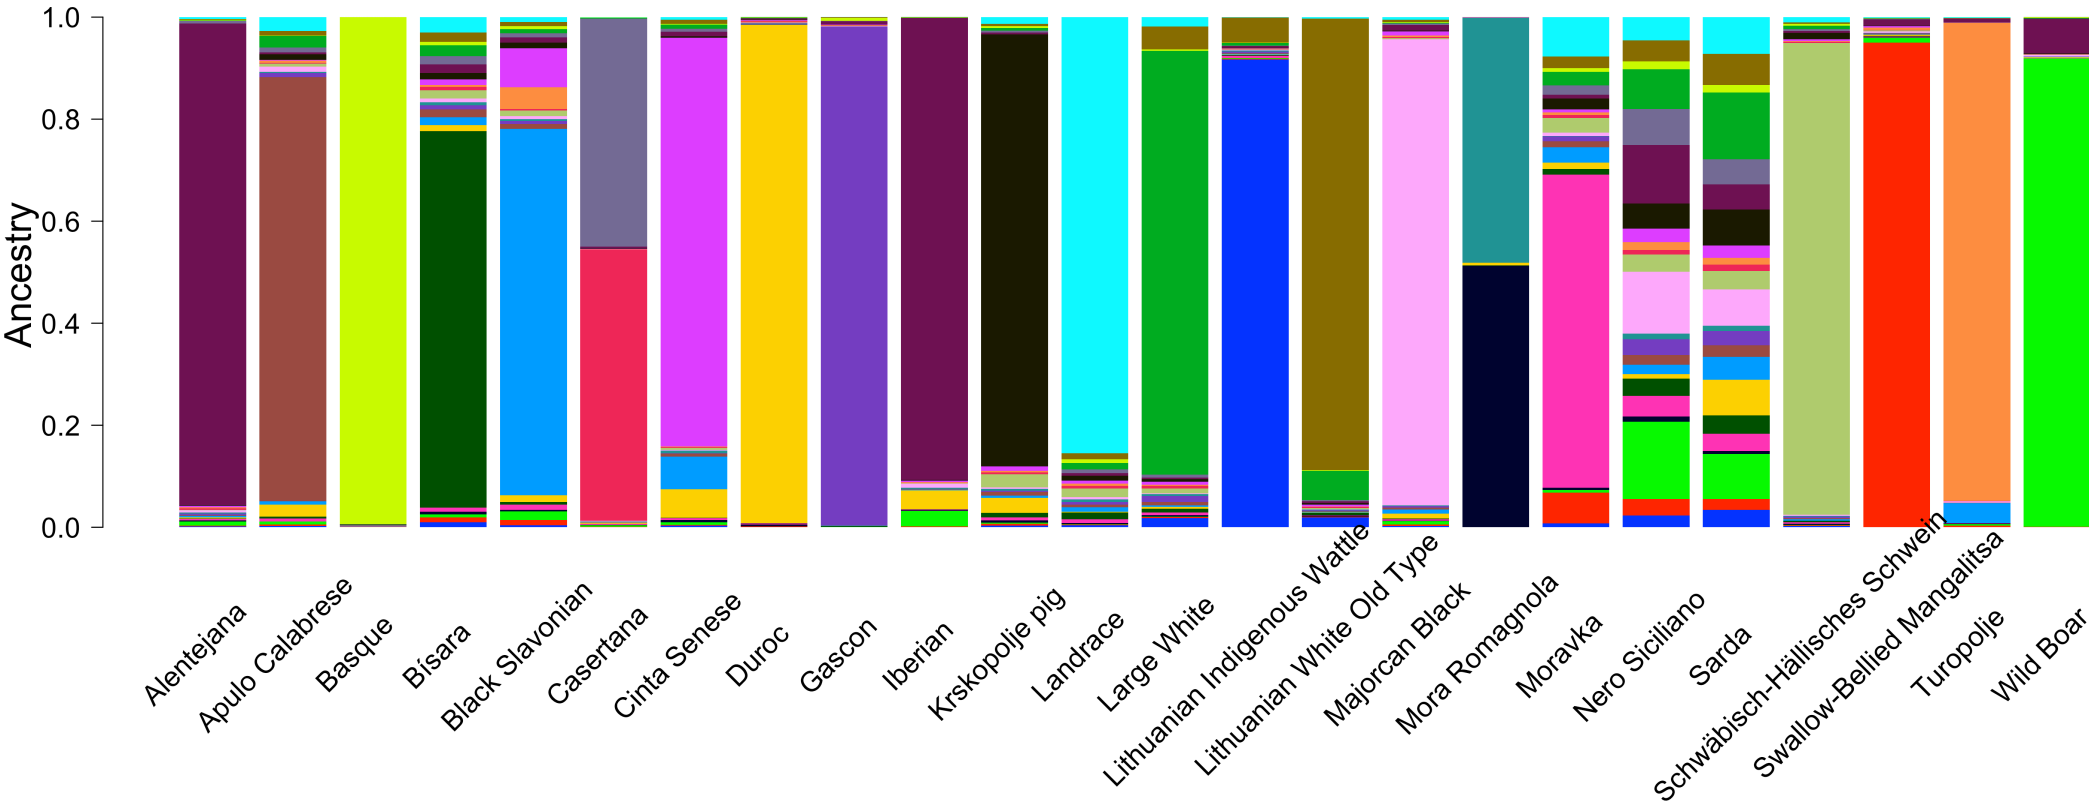

**Supplementary Fig. S2. Change of average admixture ancestries per breed from K=24 to 24.**

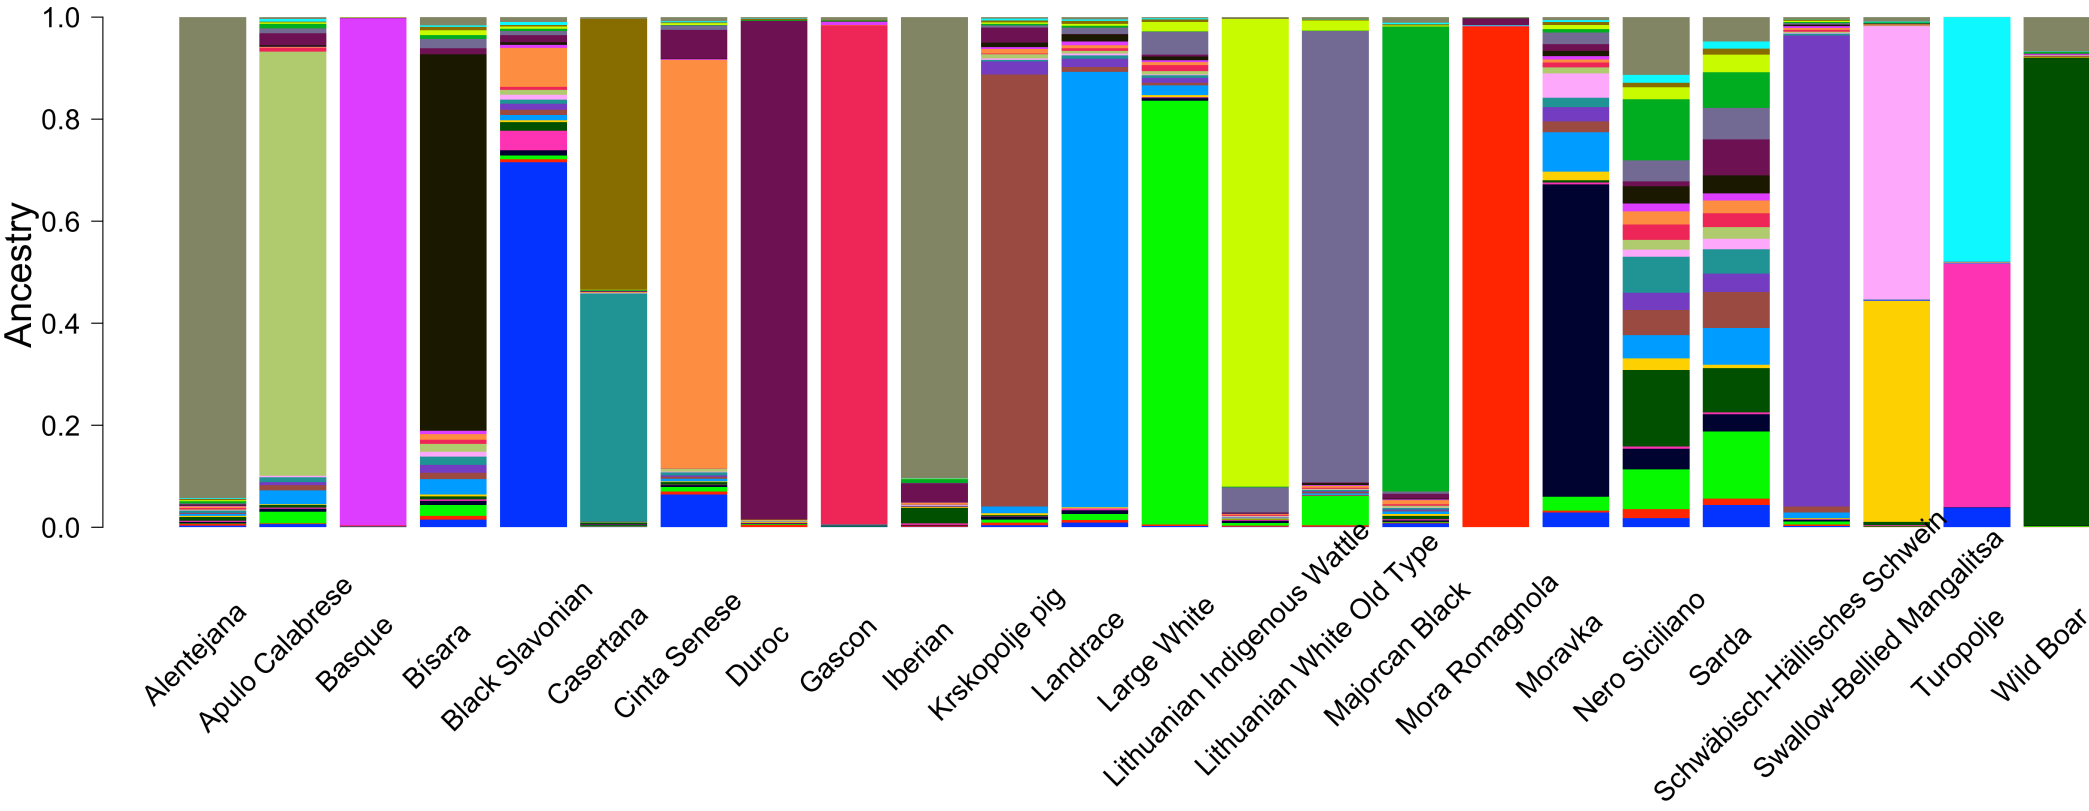

Supplement: MOESM2 [file 41598_2022_10698_MOESM2_ESM.pdf]
