# Supplementary material for: Admixture and breed traceability in European indigenous pig breeds and wild boar using genome-wide SNP data
Source: Sci Rep. 2022 May 5;12:7346. doi: 10.1038/s41598-022-10698-8 (PMC9072372; doi:10.1038/s41598-022-10698-8)
Supplement: Supplementary file 1 — Supplementary Information 1. [file 41598_2022_10698_MOESM1_ESM.pdf]

## Appendix

### Description of the external Wild Boar data included in the analysis

Selection of the external Wild Boar (WB) pigs was done from the Dryad Digital Repository: DOI: doi:10.5061/dryad.30tk6 (<http://dx.doi.org/10.5061/dryad.30tk6>), including 2,113 individuals. From those, only pigs of European, Russian and Tunisian origin were considered for analysis (n=160; Appendix Table 1). After filtering, a sample of WBs (n=51) from Finland, Hungary, Italy, Spain, Poland, Russia, The Netherlands, Tunisia, and Greece was merged with a small Spanish WB population (n=7). Principal component analyses (PCA) were used to identify potential outliers (i.e., individuals that were grouped to another breed from what was officially registered) that could lead to false results in the subsequent admixture and discriminant analysis on principal components (DAPC) analysis.

**Appendix Table 1.** Description of the 160 wild boars.

| Country Full Name | Breed Full Name         | Breed Acronym | Description   | Number_of_Individuals |
|-------------------|-------------------------|---------------|---------------|-----------------------|
| Croatia           | Croatia_WildBoar        | HRWB          | European_Wild | 16                    |
| Finland           | Finland_WildBoar        | FIWB          | European_Wild | 5                     |
| France            | NW_European_WildBoar    | NEWB          | European_Wild | 6                     |
| Greece            | Greece_Samos_WildBoar   | GRWB          | European_Wild | 7                     |
| Greece            | South_Balkan_WildBoar   | SBWB          | European_Wild | 20                    |
| Italy             | Italy_Sardinia_WildBoar | ITWB2         | European_Wild | 20                    |
| Italy             | Italy_WildBoar          | ITWB1         | European_Wild | 19                    |
| Netherlands       | NW_European_WildBoar    | NEWB          | European_Wild | 14                    |
| Poland            | Poland_WildBoar         | PLWB          | European_Wild | 8                     |
| Portugal          | Iberian_WildBoar        | IBWB          | European_Wild | 18                    |
| Russia            | Russia_Wildboar_West    | RUWB3         | European_Wild | 20                    |
| Tunisia           | Tunisia_WildBoar        | TNWB          | African_Wild  | 7                     |

The filtering procedure is described below:

1. A PCA was conducted on the 160 WB genotypes. By plotting PC1 vs. PC2, the Russian of Asian origin were clearly separated from the rest and 1 Greek from island was grouped with the Greek continental WBs (Appendix Figure 1a). Moreover, by plotting PC3 vs. PC5, 4 continental Italian and 2 Italian Sardinian WBs were separated from their group.

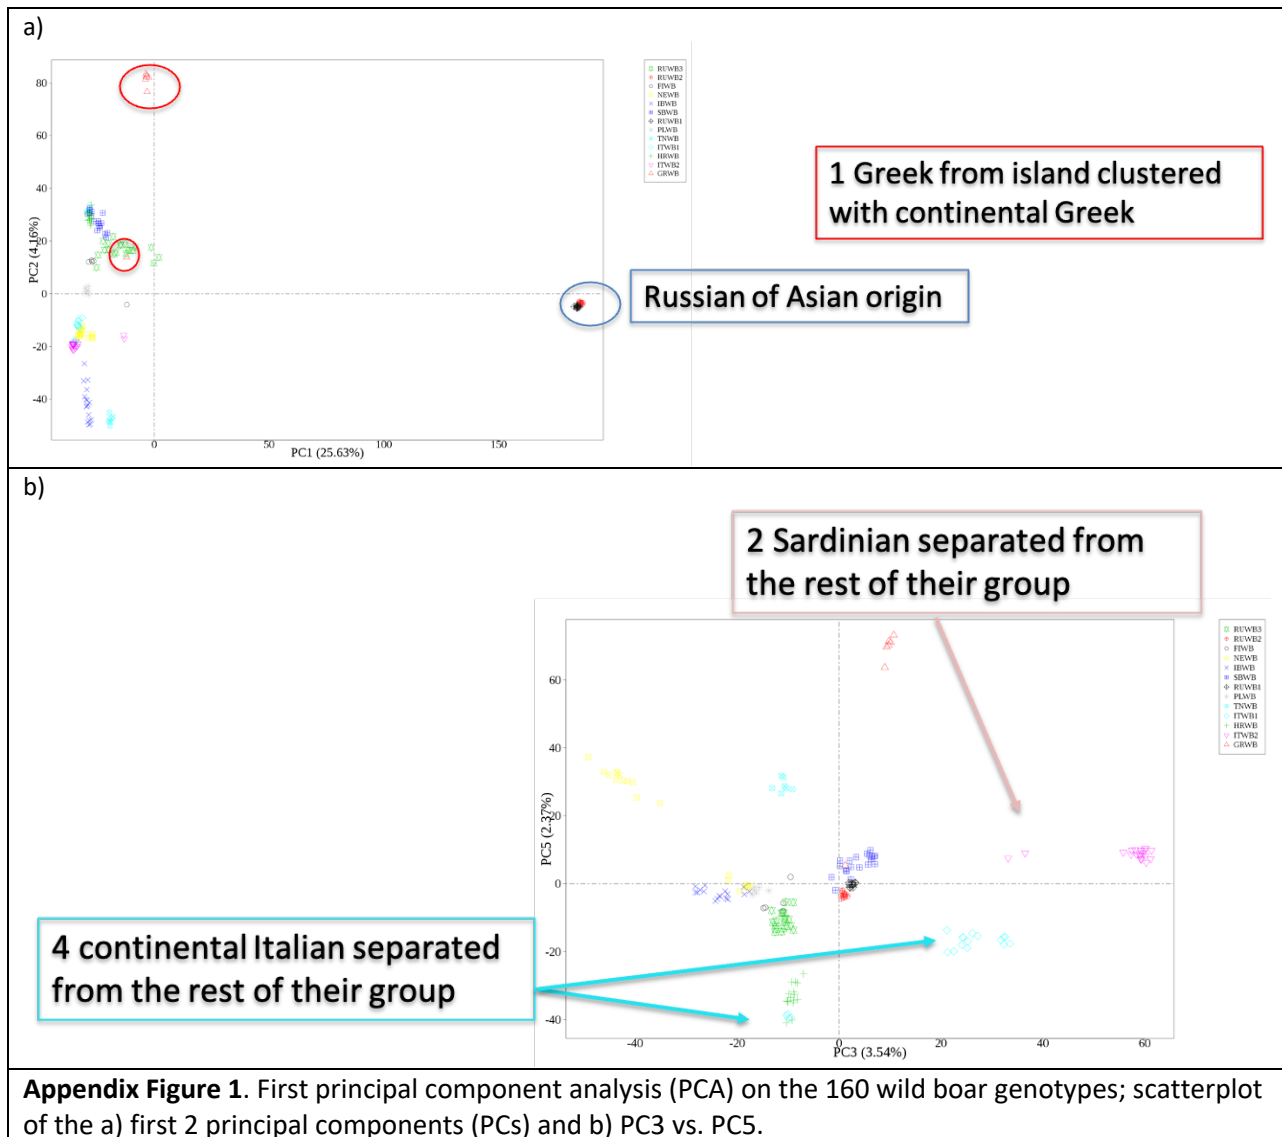

2. The Russian outliers were excluded and a PCA was conducted (Appendix Figure 2a,b). One Finish was grouped with Polish WB; 6 WBs of Dutch and French origin were separated from their breed of origin; 4 continental Italian and 2 Italian Sardinian WBs were separated from the rest of their group as in step1; 1 Greek from island was grouped with the Greek continental WBs as in step 1.

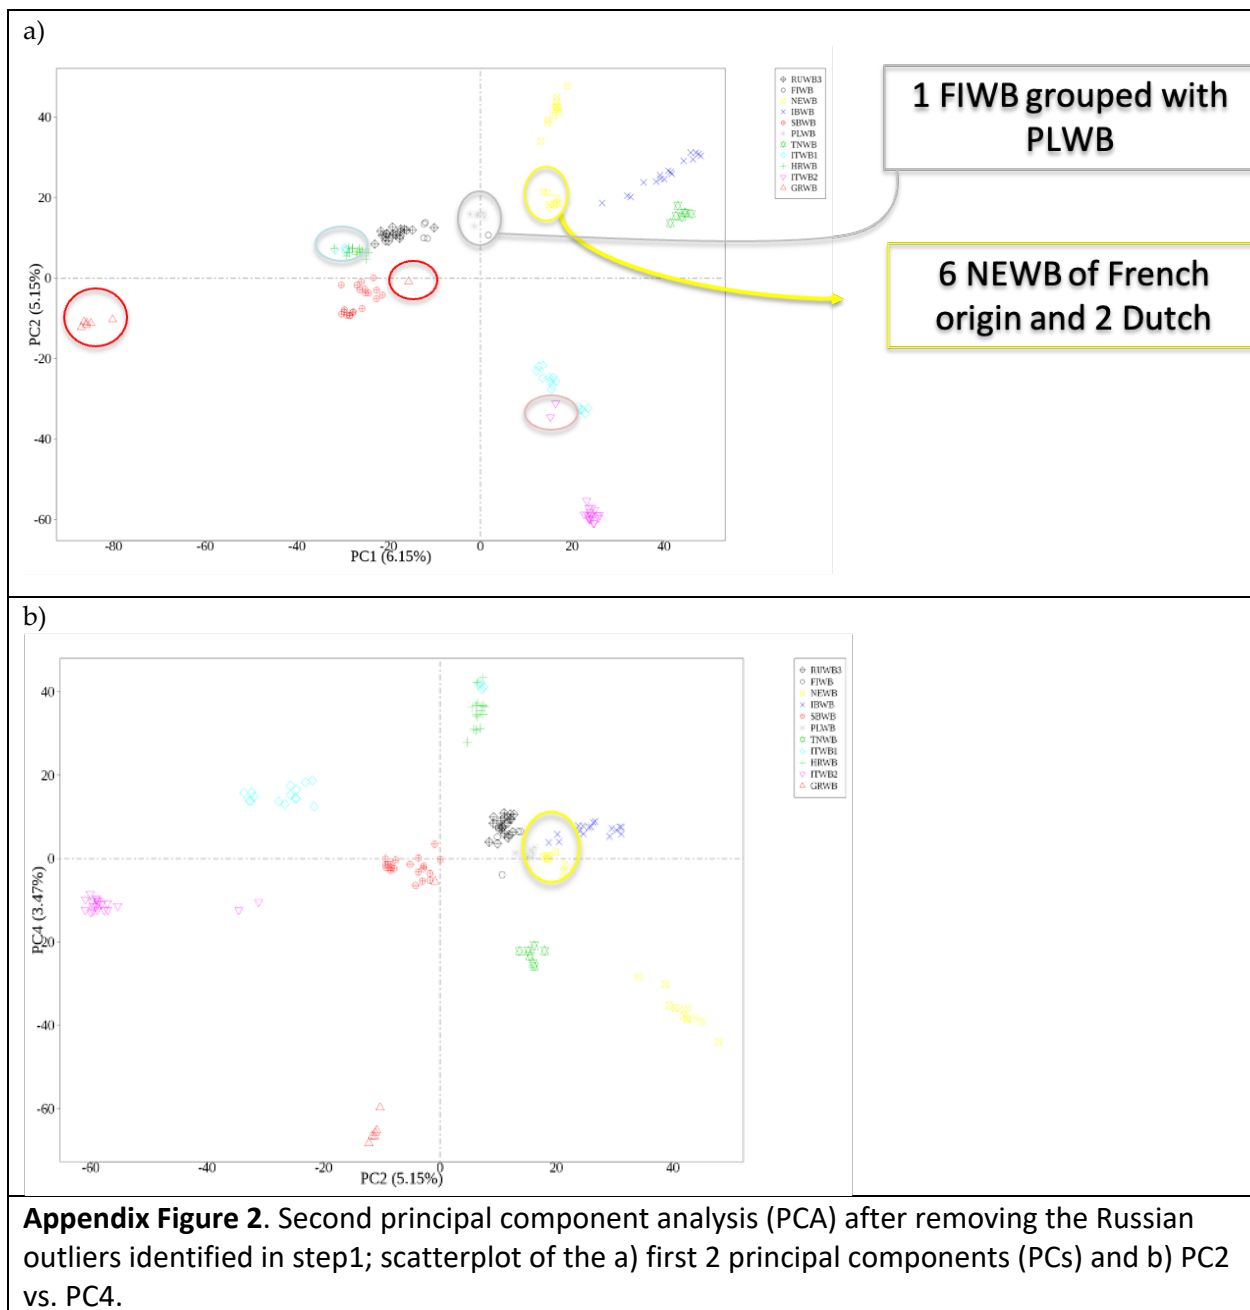

3. All of the outliers detected in step 2 were excluded and a PCA was conducted (Appendix Figure 3). After this step, a total of 141 WBs remained (Appendix Table 2).

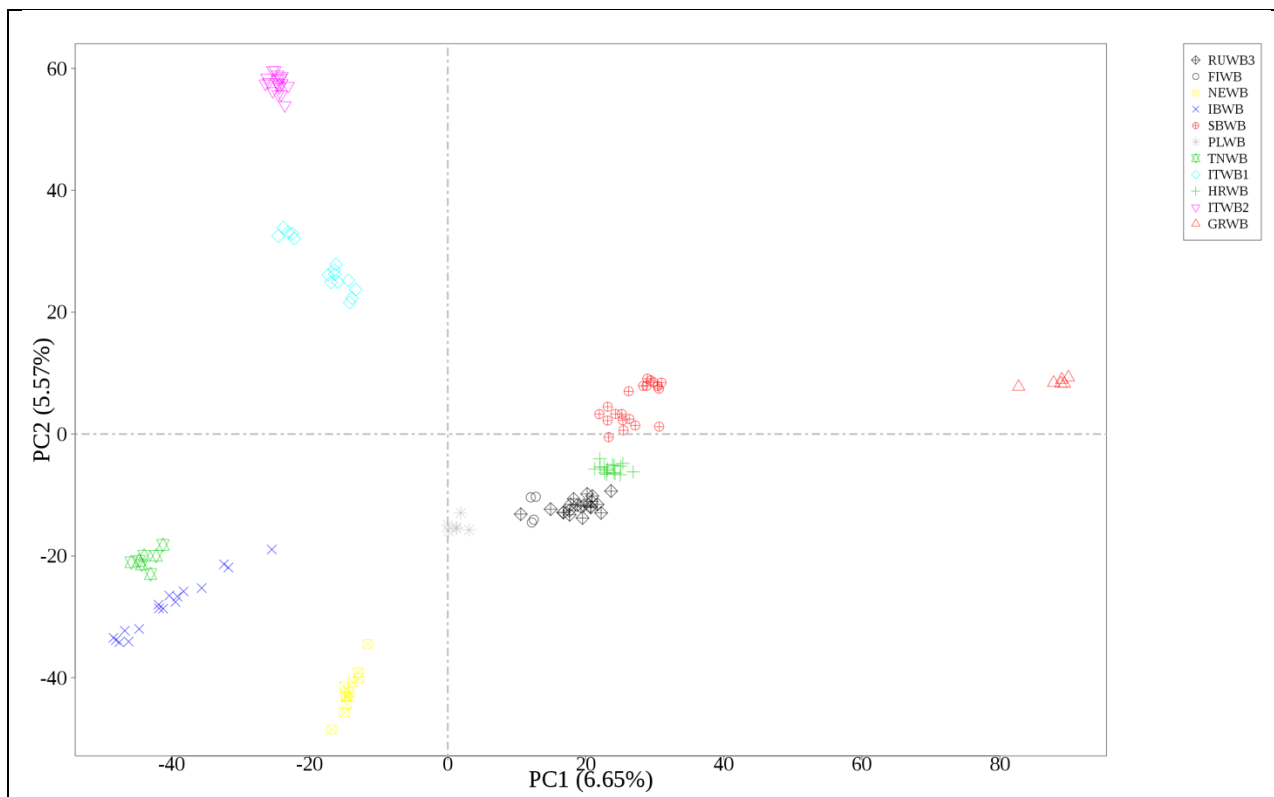

**Appendix Figure 3.** Third principal component analysis (PCA) after removing the outliers identified in step2; scatterplot of the a) first 2 principal components (PCs).

| Country_FullName | Breed_FullName          | PopName | Description   | Number_of_Individuals |
|------------------|-------------------------|---------|---------------|-----------------------|
| Croatia          | Croatia_WildBoar        | HRWB    | European_Wild | 16                    |
| Finland          | Finland_WildBoar        | FIWB    | European_Wild | 4                     |
| France           | NW_European_WildBoar    | NEWB    | European_Wild | 0                     |
| Greece           | Greece_Samos_WildBoar   | GRWB    | European_Wild | 6                     |
| Greece           | South_Balkan_WildBoar   | SBWB    | European_Wild | 20                    |
| Italy            | Italy_Sardinia_WildBoar | ITWB2   | European_Wild | 18                    |
| Italy            | Italy_WildBoar          | ITWB1   | European_Wild | 15                    |
| Netherlands      | NW_European_WildBoar    | NEWB    | European_Wild | 12                    |
| Poland           | Poland_WildBoar         | PLWB    | European_Wild | 6                     |
| Portugal         | Iberian_WildBoar        | IBWB    | European_Wild | 17                    |
| Russia           | Russia_Wildboar_West    | RUWB3   | European_Wild | 20                    |
| Tunisia          | Tunisia_WildBoar        | TNWB    | African_Wild  | 7                     |

- To have a balanced population size between the TREASURE pig breeds and the WBs, we randomly sampled 44 WBs conditionally on the country of origin (4 WBs each), such as all countries were represented. To the 44 external WBs, 7 Spanish WBs were also added, summing up to 51 WBs.

5. In total, 42,262 single nucleotide polymorphisms were in common between the TREASURE and the external WBs; with SNP positions of the WBs dataset being updated to the GeneSeek Genomic Profiler (GGP) 70 K HD, where needed.
